# Supplementary material
Source: publisher site journal article supplement (https://www.dovepress.com/article/545737)
Supplement: Supplementary file 1 [file 545737%20Revised%252509Supplementary%20Materials.docx]

# Association of 24 conventional and unconventional anthropometric indicators with pre-hypertension or hypertension: A population-based cross-sectional study in Chinese population

Ying Han1*

Huajing Chang2*

Jingru Huang3

Min Pan4,5,6

Jin Gong4,5,6

Bangbang Huang4,5,6

Liangdi Xie4,5,6

Xian-E Peng2†

Huashan Hong7†

1Fujian Medical University Union Hospital, Fuzhou, China; 2Department of Epidemiology and Health Statistics, Fujian Provincial Key Laboratory of Environment Factors and Cancer, School of Public Health, Fujian Medical University, Fuzhou, China; 3College of Integrated Chinese and Western Medicine, Fujian University of Traditional Chinese Medicine, Fuzhou, China; 4Department of Geriatrics, The First Affiliated Hospital of Fujian Medical University, Fuzhou, China; 5Institution of Fujian Hypertension Research, The First Affiliated Hospital of Fujian Medical University, Fuzhou, China; 6Fujian Provincial Sub-center of National Clinical Research Center for Geriatric Disorders, The First Affiliated Hospital of Fujian Medical University, Fuzhou, China; 7Department of Geriatrics, Fujian Key Laboratory of Vascular Aging (Fujian Medical University), Fujian Institute of Geriatrics, Fujian Clinical Research Center for Senile Vascular Aging and Brain Aging, Fujian Medical University Union Hospital, Fuzhou, China.

*These authors contributed equally to this work.

†Correspondence: Xian-E Peng, Huashan Hong.

# Supplementary Tables legends

**Supplementary Table 1:** STROBE Statement—Checklist of items that should be included in reports of cross-sectional studies

**Supplementary Table 2:** Univariate logistic regression analysis of conventional and unconventional anthropometric parameters with pre-hypertension and hypertension

**Supplementary Table 3:** Correlation matrix of the conventional and unconventional anthropometric parameters

**Supplementary Table 4**: Sensitivity analyses of the conventional and unconventional anthropometric parameters with prehypertension and hypertension

# Supplementary Figures legends

**Supplementary Figure 1:** Heat map of the conventional and unconventional anthropometric parameters

**Supplementary Figure 2:** Subgroup analyses of the conventional and unconventional anthropometric parameters with prehypertension and hypertension

**Supplementary Table 1** STROBE Statement—Checklist of items that should be included in reports of cross-sectional studies

|  | Item No | Recommendation | Reported on  Section | |
| --- | --- | --- | --- | --- |
| Title and abstract | 1 | (*a*) Indicate the study’s design with a commonly used term in the title or the abstract | *Title* | |
| (*b*) Provide in the abstract an informative and balanced summary of what was done and what was found | *Abstract* | |
| Introduction | | |  |
| Background/rationale | 2 | Explain the scientific background and rationale for the investigation being reported | *Introduction, paragraphs 1-3* | |
| Objectives | 3 | State specific objectives, including any prespecified hypotheses | *Introduction, paragraph 4* | |
| Methods | | |  |
| Study design | 4 | Present key elements of study design early in the paper | *Methods, subsection 2.1. “Study design and population”* | |
| Setting | 5 | Describe the setting, locations, and relevant dates, including periods of recruitment, exposure, follow-up, and data collection | *Methods, subsection 2.1. “Study design and population”* | |
| Participants | 6 | (*a*) Give the eligibility criteria, and the sources and methods of selection of participants | *Methods, subsection 2.1. “Study design and population”, paragraph 2*  *Results, subsection 3.1. “Characteristics of the study population”*  *Figure 1* | |
| Variables | 7 | Clearly define all outcomes, exposures, predictors, potential confounders, and effect modifiers. Give diagnostic criteria, if applicable | *Methods, subsections 2.2.-2.4.* | |
| Data sources/ measurement | 8* | For each variable of interest, give sources of data and details of methods of assessment (measurement). Describe comparability of assessment methods if there is more than one group | *Methods, subsections 2.2.-2.4.* | |
| Bias | 9 | Describe any efforts to address potential sources of bias | *Methods, subsection 2.5. “Statistical analysis”*  *Results, subsection 3.7. “Subgroup analyses and sensitivity analyses”* | |
| Study size | 10 | Explain how the study size was arrived at | *Methods, subsection 2.1. “Study design and population”* | |
| Quantitative variables | 11 | Explain how quantitative variables were handled in the analyses. If applicable, describe which groupings were chosen and why | *Methods, subsection 2.5. “Statistical analysis”* | |
| Statistical methods | 12 | (*a*) Describe all statistical methods, including those used to control for confounding | *Methods, subsection 2.5. “Statistical analysis”* | |
| (*b*) Describe any methods used to examine subgroups and interactions | *Methods, subsection 2.5. “Statistical analysis”* | |
| (*c*) Explain how missing data were addressed | *Methods, subsection 2.1. “Study design and population”, paragraph 2*  *Figure 1* | |
| (*d*) If applicable, describe analytical methods taking account of sampling strategy | N/A | |
| (*e*) Describe any sensitivity analyses | *Results, subsection 3.7. “Subgroup analyses and sensitivity analyses”* | |
| Results | | |  |
| Participants | 13* | (a) Report numbers of individuals at each stage of study—eg numbers potentially eligible, examined for eligibility, confirmed eligible, included in the study, completing follow-up, and analysed | *Methods, subsection 2.1. “Study design and population”*  *Results, subsection 3.1. “Characteristics of the study population”*  *Figure 1* | |
| (b) Give reasons for non-participation at each stage | *Methods, subsection 2.1. “Study design and population”*  *Figure 1* | |
| (c) Consider use of a flow diagram | *Results, subsection 3.1. “Characteristics of the study population”*  *Figure 1* | |
| Descriptive data | 14* | (a) Give characteristics of study participants (eg demographic, clinical, social) and information on exposures and potential confounders | *Results, subsections 3.1.-3.2.*  *Table 1, Table 2* | |
| (b) Indicate number of participants with missing data for each variable of interest | N/A | |
| Outcome data | 15* | Report numbers of outcome events or summary measures | *Results, subsection 3.4. “Association of conventional and unconventional anthropometric indicators with pre-hypertension and hypertension”*  *Table 3* | |
| Main results | 16 | (*a*) Give unadjusted estimates and, if applicable, confounder-adjusted estimates and their precision (eg, 95% confidence interval). Make clear which confounders were adjusted for and why they were included | *Results, subsections 3.4.-3.7.*  *Table 3, Figure 3-4*  Supplementary Materials-*Table S4* | |
| (*b*) Report category boundaries when continuous variables were categorized | *Methods, subsection 2.2. “Blood pressure measurement and definition of pre-hypertension or hypertension”, paragraph 2* | |
| (*c*) If relevant, consider translating estimates of relative risk into absolute risk for a meaningful time period | N/A | |
| Other analyses | 17 | Report other analyses done—eg analyses of subgroups and interactions, and sensitivity analyses | *Results, subsection 3.7. “Subgroup analyses and sensitivity analyses”*  Supplementary Materials-*Figure S2, Table S4* | |
| Discussion | | |  |
| Key results | 18 | Summarise key results with reference to study objectives | *Discussion, paragraph 1* | |
| Limitations | 19 | Discuss limitations of the study, taking into account sources of potential bias or imprecision. Discuss both direction and magnitude of any potential bias | *Discussion, paragraph 7* | |
| Interpretation | 20 | Give a cautious overall interpretation of results considering objectives, limitations, multiplicity of analyses, results from similar studies, and other relevant evidence | *Discussion, paragraph 1-7* | |
| Generalisability | 21 | Discuss the generalisability (external validity) of the study results | *Discussion, paragraph 7* | |
| Other information | | |  |
| Funding | 22 | Give the source of funding and the role of the funders for the present study and, if applicable, for the original study on which the present article is based | *Funding* | |

*Give information separately for exposed and unexposed groups.

**Note:** An Explanation and Elaboration article discusses each checklist item and gives methodological background and published examples of transparent reporting. The STROBE checklist is best used in conjunction with this article (freely available on the Web sites of PLoS Medicine at http://www.plosmedicine.org/, Annals of Internal Medicine at http://www.annals.org/, and Epidemiology at http://www.epidem.com/). Information on the STROBE Initiative is available at www.strobe-statement.org.

**Supplementary Table 2** Univariate logistic regression analysis of conventional and unconventional anthropometric parameters with pre-hypertension and hypertension

| Variables | Pre-hypertension | |  | Hypertension | |
| --- | --- | --- | --- | --- | --- |
| OR (95%CI) | *P* value |  | OR (95%CI) | *P* value |
| Height | 1.036 (1.029, 1.042) | <0.001 |  | 0.992 (0.986, 0.998) | 0.006 |
| Weight | 1.053 (1.047, 1.058) | <0.001 |  | 1.056 (1.050, 1.061) | <0.001 |
| WC | 1.060 (1.054, 1.067) | <0.001 |  | 1.113 (1.106, 1.121) | <0.001 |
| FM | 1.042 (1.033, 1.051) | <0.001 |  | 1.091 (1.082, 1.101) | <0.001 |
| FFM | 1.064 (1.057, 1.071) | <0.001 |  | 1.045 (1.039, 1.052) | <0.001 |
| BFP | 1.000 (0.993, 1.007) | 0.955 |  | 1.046 (1.039, 1.054) | <0.001 |
| VFI | 1.071 (1.056, 1.087) | <0.001 |  | 1.170 (1.152, 1.189) | <0.001 |
| BMR | 1.0026 (1.0023, 1.0029) | <0.001 |  | 1.0018 (1.0015, 1.0020) | <0.001 |
| BMI | 1.154 (1.135, 1.173) | <0.001 |  | 1.281 (1.258, 1.306) | <0.001 |
| HtaW | 1.005 (1.004, 1.006) | <0.001 |  | 1.007 (1.006, 1.008) | <0.001 |
| WHtR | 1.082 (1.071, 1.092) | <0.001 |  | 1.207 (1.194, 1.221) | <0.001 |
| FMI | 1.055 (1.041, 1.069) | <0.001 |  | 1.149 (1.133, 1.166) | <0.001 |
| FFMI | 1.144 (1.129, 1.160) | <0.001 |  | 1.124 (1.110, 1.139) | <0.001 |
| WCI | 2.049 (1.900, 2.212) | <0.001 |  | 4.472 (4.089, 4.900) | <0.001 |
| WWI | 1.373 (1.286, 1.466) | <0.001 |  | 2.993 (2.774, 3.235) | <0.001 |
| BSA | 21.000 (15.359, 28.842) | <0.001 |  | 14.042 (10.408, 19.014) | <0.001 |
| AIP | 4.695 (3.835, 5.760) | <0.001 |  | 12.665 (10.266, 15.678) | <0.001 |
| LAP | 1.020 (1.017, 1.023) | <0.001 |  | 1.039 (1.036, 1.043) | <0.001 |
| VAI | 1.259 (1.200, 1.324) | <0.001 |  | 1.623 (1.539, 1.714) | <0.001 |
| TyG | 2.309 (2.091, 2.554) | <0.001 |  | 4.447 (3.999, 4.956) | <0.001 |
| CI | 1.040 (1.034, 1.046) | <0.001 |  | 1.104 (1.097, 1.112) | <0.001 |
| BRI | 1.535 (1.457, 1.618) | <0.001 |  | 2.727 (2.566, 2.902) | <0.001 |
| ABSI | 1.483 (1.354, 1.626) | <0.001 |  | 3.221 (2.908, 3.574) | <0.001 |
| CMI | 2.640 (2.280, 3.072) | <0.001 |  | 6.002 (5.084, 7.122) | <0.001 |

**Abbreviations:** WC, Waist Circumference; FM, Fat Mass; FFM, Fat-Free Mass; BFP, Body Fat Percentage; VFI, Visceral Fat Index; BMR, Basal Metabolic Rate; BMI, Body Mass Index; HtaW, Height-adjusted Weight; WHtR, Waist-Height Ratio; FMI, Fat Mass Index; FFMI, Fat-Free Mass Index; WCI, Waist Circumference Index; WWI, Weight-adjusted-Waist Index; BSA, Body Surface Area; AIP, Atherogenic Index of Plasma; LAP, Lipid Accumulation Product; VAI, Visceral Adiposity Index; TyG, Triglyceride-Glucose Index; CI, Conicity Index; BRI, Body Roundness Index; ABSI, A Body Shape Index; CMI, Cardiometabolic Index.

**Supplementary Table 3** Correlation matrix of the conventional and unconventional anthropometric parameters

|  | Height | Weight | WC | FM | FFM | BFP | VFI | BMR | BMI | HtaW | WHtR | FMI | FFMI | WCI | WWI | BSA | AIP | LAP | VAI | TyG | CI | BRI | ABSI | CMI |
| --- | --- | --- | --- | --- | --- | --- | --- | --- | --- | --- | --- | --- | --- | --- | --- | --- | --- | --- | --- | --- | --- | --- | --- | --- |
| Height | 1.000 |  |  |  |  |  |  |  |  |  |  |  |  |  |  |  |  |  |  |  |  |  |  |  |
| Weight | 0.602 | 1.000 |  |  |  |  |  |  |  |  |  |  |  |  |  |  |  |  |  |  |  |  |  |  |
| WC | 0.266 | 0.760 | 1.000 |  |  |  |  |  |  |  |  |  |  |  |  |  |  |  |  |  |  |  |  |  |
| FM | -0.015† | 0.641 | 0.637 | 1.000 |  |  |  |  |  |  |  |  |  |  |  |  |  |  |  |  |  |  |  |  |
| FFM | 0.818 | 0.829 | 0.535 | 0.144 | 1.000 |  |  |  |  |  |  |  |  |  |  |  |  |  |  |  |  |  |  |  |
| BFP | -0.483 | 0.119 | 0.274 | 0.771 | -0.391 | 1.000 |  |  |  |  |  |  |  |  |  |  |  |  |  |  |  |  |  |  |
| VFI | -0.115 | 0.520 | 0.569 | 0.922 | 0.031 | 0.843 | 1.000 |  |  |  |  |  |  |  |  |  |  |  |  |  |  |  |  |  |
| BMR | 0.822 | 0.828 | 0.529 | 0.189 | 0.962 | -0.384 | 0.037 | 1.000 |  |  |  |  |  |  |  |  |  |  |  |  |  |  |  |  |
| BMI | 0.044 | 0.800 | 0.773 | 0.839 | 0.441 | 0.518 | 0.763 | 0.435 | 1.000 |  |  |  |  |  |  |  |  |  |  |  |  |  |  |  |
| HtaW | 0.286 | 0.440 | 0.379 | 0.235 | 0.404 | -0.008† | 0.186 | 0.405 | 0.356 | 1.000 |  |  |  |  |  |  |  |  |  |  |  |  |  |  |
| WHtR | -0.141 | 0.510 | 0.901 | 0.653 | 0.204 | 0.484 | 0.630 | 0.197 | 0.770 | 0.281 | 1.000 |  |  |  |  |  |  |  |  |  |  |  |  |  |
| FMI | -0.166 | 0.532 | 0.584 | 0.986 | 0.015† | 0.842 | 0.930 | 0.060 | 0.819 | 0.193 | 0.668 | 1.000 |  |  |  |  |  |  |  |  |  |  |  |  |
| FFMI | 0.703 | 0.845 | 0.589 | 0.191 | 0.982 | -0.334 | 0.079 | 0.940 | 0.542 | 0.415 | 0.306 | 0.078 | 1.000 |  |  |  |  |  |  |  |  |  |  |  |
| WCI | 0.065 | 0.650 | 0.975 | 0.661 | 0.378 | 0.388 | 0.615 | 0.372 | 0.791 | 0.338 | 0.974 | 0.641 | 0.458 | 1.000 |  |  |  |  |  |  |  |  |  |  |
| WWI | -0.259 | 0.097 | 0.686 | 0.278 | -0.071 | 0.290 | 0.305 | -0.079 | 0.323 | 0.110 | 0.830 | 0.315 | -0.001† | 0.775 | 1.000 |  |  |  |  |  |  |  |  |  |
| BSA | 0.745 | 0.979 | 0.693 | 0.523 | 0.893 | -0.022 | 0.398 | 0.893 | 0.668 | 0.437 | 0.385 | 0.396 | 0.876 | 0.552 | 0.015† | 1.000 |  |  |  |  |  |  |  |  |
| AIP | 0.168 | 0.417 | 0.460 | 0.321 | 0.323 | 0.100 | 0.285 | 0.322 | 0.416 | 0.211 | 0.402 | 0.289 | 0.354 | 0.442 | 0.255 | 0.385 | 1.000 |  |  |  |  |  |  |  |
| LAP | 0.102 | 0.598 | 0.817 | 0.609 | 0.346 | 0.356 | 0.566 | 0.344 | 0.693 | 0.257 | 0.792 | 0.581 | 0.405 | 0.824 | 0.599 | 0.517 | 0.785 | 1.000 |  |  |  |  |  |  |
| VAI | 0.004† | 0.322 | 0.466 | 0.384 | 0.148 | 0.257 | 0.368 | 0.150 | 0.415 | 0.117 | 0.476 | 0.375 | 0.188 | 0.483 | 0.367 | 0.265 | 0.951 | 0.835 | 1.000 |  |  |  |  |  |
| TyG | 0.082 | 0.356 | 0.438 | 0.323 | 0.240 | 0.152 | 0.303 | 0.238 | 0.401 | 0.184 | 0.417 | 0.303 | 0.278 | 0.438 | 0.291 | 0.313 | 0.917 | 0.789 | 0.891 | 1.000 |  |  |  |  |
| CI | 0.061 | 0.307 | 0.811 | 0.292 | 0.196 | 0.147 | 0.287 | 0.189 | 0.354 | 0.210 | 0.810 | 0.278 | 0.232 | 0.831 | 0.937 | 0.268 | 0.322 | 0.659 | 0.385 | 0.330 | 1.000 |  |  |  |
| BRI | -0.141 | 0.510 | 0.901 | 0.653 | 0.204 | 0.484 | 0.630 | 0.197 | 0.770 | 0.281 | 1.000 | 0.668 | 0.306 | 0.974 | 0.830 | 0.385 | 0.402 | 0.792 | 0.476 | 0.417 | 0.810 | 1.000 |  |  |
| ABSI | 0.051 | 0.075 | 0.605 | 0.043 | 0.069 | -0.012† | 0.062 | 0.061 | 0.065 | 0.107 | 0.603 | 0.034 | 0.074 | 0.618 | 0.889 | 0.073 | 0.211 | 0.476 | 0.278 | 0.223 | 0.945 | 0.603 | 1.000 |  |
| CMI | 0.126 | 0.475 | 0.584 | 0.412 | 0.331 | 0.181 | 0.376 | 0.330 | 0.520 | 0.243 | 0.547 | 0.385 | 0.379 | 0.580 | 0.384 | 0.423 | 0.984 | 0.867 | 0.957 | 0.913 | 0.441 | 0.547 | 0.303 | 1.000 |

**Abbreviations:** WC, Waist Circumference; FM, Fat Mass; FFM, Fat-Free Mass; BFP, Body Fat Percentage; VFI, Visceral Fat Index; BMR, Basal Metabolic Rate; BMI, Body Mass Index; HtaW, Height-adjusted Weight; WHtR, Waist-Height Ratio; FMI, Fat Mass Index; FFMI, Fat-Free Mass Index; WCI, Waist Circumference Index; WWI, Weight-adjusted-Waist Index; BSA, Body Surface Area; AIP, Atherogenic Index of Plasma; LAP, Lipid Accumulation Product; VAI, Visceral Adiposity Index; TyG, Triglyceride-Glucose Index; CI, Conicity Index; BRI, Body Roundness Index; ABSI, A Body Shape Index; CMI, Cardiometabolic Index. **Note:** †, *P* > 0.05.

**Supplementary Table 4** Sensitivity analyses of the conventional and unconventional anthropometric parameters with prehypertension and hypertension

|  | Model 1 | | Model 2 | | Model 3 | | Model 4 | |
| --- | --- | --- | --- | --- | --- | --- | --- | --- |
| OR (95%CI) | *P* value | OR (95%CI) | *P* value | OR (95%CI) | *P* value | OR (95%CI) | *P* value |
| 1. Excluding participants with a family history of hypertension or cardiovascular diseases | | | | | | | | |
| Pre-hypertension (reference= normotension, N = 4511) | | | | | | | | |
| Weight | 2.458 (1.467, 4.162) | 0.001 | 2.332 (1.369, 4.010) | 0.002 | 2.296 (1.348, 3.949) | 0.002 | 2.242 (1.315, 3.860) | 0.003 |
| FFM | 0.683 (0.515, 0.901) | 0.008 | 0.763 (0.574, 1.008) | 0.059 | 0.761 (0.573, 1.004) | 0.056 | 0.768 (0.578, 1.014) | 0.065 |
| VFI | 1.019 (0.967, 1.073) | 0.487 | 1.004 (0.953, 1.059) | 0.868 | 1.006 (0.954, 1.060) | 0.831 | 1.003 (0.952, 1.058) | 0.903 |
| BMR | 0.999 (0.998, 1.000) | 0.244 | 0.999 (0.998, 1.000) | 0.135 | 0.999 (0.998, 1.000) | 0.143 | 0.999 (0.998, 1.000) | 0.140 |
| BMI | 4.606 (1.607, 13.341) | 0.005 | 5.102 (1.690, 15.552) | 0.004 | 4.866 (1.610, 14.851) | 0.005 | 4.601 (1.518, 14.079) | 0.007 |
| HtaW | 1.000 (0.998, 1.001) | 0.644 | 0.998 (0.996, 1.000) | 0.014 | 0.998 (0.996, 1.000) | 0.015 | 0.998 (0.996, 1.000) | 0.020 |
| FMI | 0.091 (0.020, 0.394) | 0.001 | 0.102 (0.022, 0.468) | 0.004 | 0.107 (0.023, 0.493) | 0.004 | 0.115 (0.024, 0.531) | 0.006 |
| FFMI | 0.185 (0.053, 0.644) | 0.008 | 0.162 (0.043, 0.600) | 0.007 | 0.172 (0.046, 0.637) | 0.009 | 0.182 (0.048, 0.675) | 0.011 |
| WWI | 1.061 (0.691, 1.624) | 0.786 | 1.203 (0.772, 1.869) | 0.412 | 1.203 (0.771, 1.868) | 0.414 | 1.182 (0.757, 1.836) | 0.460 |
| AIP | 0.186 (0.083, 0.412) | <0.001 | 0.286 (0.125, 0.648) | 0.003 | 0.298 (0.130, 0.678) | 0.004 | 0.281 (0.102, 0.762) | 0.013 |
| LAP | 0.986 (0.977, 0.996) | 0.004 | 0.999 (0.989, 1.009) | 0.862 | 0.999 (0.990, 1.009) | 0.910 | 0.999 (0.989, 1.009) | 0.774 |
| VAI | 0.624 (0.493, 0.782) | <0.001 | 1.079 (0.814, 1.432) | 0.594 | 1.055 (0.794, 1.400) | 0.710 | 1.067 (0.803, 1.417) | 0.652 |
| TyG | 4.746 (3.429, 6.604) | <0.001 | 2.725 (1.934, 3.860) | <0.001 | 2.697 (1.912, 3.824) | <0.001 | 2.610 (1.733, 3.966) | <0.001 |
| BRI | 1.327 (0.805, 2.204) | 0.270 | 0.864 (0.516, 1.460) | 0.583 | 0.863 (0.515, 1.458) | 0.580 | 0.884 (0.527, 1.494) | 0.641 |
| CMI | 4.065 (2.089, 8.159) | <0.001 | 0.698 (0.304, 1.623) | 0.399 | 0.736 (0.320, 1.716) | 0.472 | 0.791 (0.342, 1.857) | 0.585 |
| Hypertension (reference= normotension, N = 4314) | | | | | | | | |
| Height | 1.016 (0.925, 1.117) | 0.734 | 1.032 (0.928, 1.146) | 0.564 | 1.030 (0.926, 1.144) | 0.589 | 1.032 (0.928, 1.147) | 0.560 |
| WC | 0.777 (0.616, 0.978) | 0.032 | 0.754 (0.585, 0.967) | 0.027 | 0.774 (0.600, 0.995) | 0.047 | 0.771 (0.598, 0.991) | 0.044 |
| FM | 1.802 (1.289, 2.552) | 0.001 | 1.443 (1.004, 2.086) | 0.048 | 1.473 (1.025, 2.135) | 0.037 | 1.483 (1.031, 2.151) | 0.034 |
| BFP | 0.954 (0.921, 0.988) | 0.008 | 0.990 (0.951, 1.031) | 0.619 | 0.991 (0.952, 1.032) | 0.661 | 0.992 (0.952, 1.033) | 0.689 |
| VFI | 1.088 (1.019, 1.164) | 0.013 | 0.994 (0.922, 1.071) | 0.873 | 0.998 (0.926, 1.076) | 0.959 | 0.996 (0.923, 1.073) | 0.909 |
| BMR | 0.998 (0.997, 1.000) | 0.042 | 1.000 (0.999, 1.002) | 0.815 | 1.000 (0.999, 1.002) | 0.763 | 1.000 (0.999, 1.002) | 0.741 |
| BMI | 0.835 (0.374, 1.885) | 0.661 | 0.731 (0.310, 1.729) | 0.473 | 0.812 (0.342, 1.939) | 0.635 | 0.815 (0.344, 1.948) | 0.642 |
| HtaW | 1.003 (1.002, 1.005) | <0.001 | 0.999 (0.997, 1.001) | 0.185 | 0.999 (0.997, 1.001) | 0.175 | 0.999 (0.997, 1.001) | 0.169 |
| WHtR | 1.839 (1.091, 3.095) | 0.022 | 1.780 (1.019, 3.103) | 0.042 | 1.677 (0.956, 2.930) | 0.070 | 1.697 (0.968, 2.964) | 0.063 |
| FMI | 0.424 (0.165, 1.051) | 0.068 | 0.815 (0.303, 2.170) | 0.681 | 0.736 (0.271, 1.962) | 0.540 | 0.721 (0.264, 1.924) | 0.514 |
| FFMI | 1.185 (0.739, 1.885) | 0.475 | 1.396 (0.846, 2.307) | 0.190 | 1.311 (0.789, 2.168) | 0.290 | 1.299 (0.781, 2.150) | 0.308 |
| WWI | 1.297 (0.440, 3.918) | 0.640 | 1.911 (0.603, 6.541) | 0.284 | 1.950 (0.612, 6.717) | 0.271 | 1.867 (0.586, 6.440) | 0.304 |
| AIP | 0.050 (0.020, 0.124) | <0.001 | 0.207 (0.076, 0.552) | 0.002 | 0.243 (0.089, 0.654) | 0.005 | 0.143 (0.043, 0.463) | 0.001 |
| LAP | 0.981 (0.972, 0.990) | <0.001 | 1.001 (0.991, 1.011) | 0.876 | 1.001 (0.990, 1.011) | 0.913 | 1.002 (0.991, 1.013) | 0.777 |
| VAI | 0.380 (0.292, 0.490) | <0.001 | 0.808 (0.569, 1.153) | 0.235 | 0.805 (0.567, 1.149) | 0.227 | 0.821 (0.577, 1.176) | 0.278 |
| TyG | 14.650 (10.161, 21.302) | <0.001 | 4.685 (3.105, 7.128) | <0.001 | 4.377 (2.895, 6.675) | <0.001 | 5.075 (3.133, 8.330) | <0.001 |
| BRI | 0.785 (0.301, 2.087) | 0.624 | 0.399 (0.141, 1.151) | 0.085 | 0.426 (0.151, 1.237) | 0.112 | 0.423 (0.149, 1.226) | 0.109 |
| CMI | 17.058 (8.054, 38.104) | <0.001 | 1.272 (0.493, 3.331) | 0.620 | 1.266 (0.490, 3.321) | 0.627 | 1.348 (0.516, 3.580) | 0.544 |
| 1. Excluding current smokers or current drinkers | | | | | | | | |
| Pre-hypertension (reference= normotension, N = 3920) | | | | | | | | |
| Weight | 2.451 (1.339, 4.531) | 0.004 | 1.954 (1.052, 3.669) | 0.035 | 1.971 (1.062, 3.700) | 0.033 | 1.943 (1.044, 3.653) | 0.038 |
| FFM | 0.841 (0.601, 1.175) | 0.311 | 0.974 (0.694, 1.364) | 0.880 | 0.971 (0.691, 1.358) | 0.863 | 0.980 (0.697, 1.372) | 0.905 |
| VFI | 1.048 (0.989, 1.110) | 0.114 | 1.014 (0.957, 1.075) | 0.644 | 1.013 (0.956, 1.074) | 0.660 | 1.011 (0.954, 1.072) | 0.704 |
| BMR | 1.000 (0.998, 1.001) | 0.611 | 1.000 (0.998, 1.001) | 0.540 | 1.000 (0.998, 1.001) | 0.554 | 1.000 (0.998, 1.001) | 0.524 |
| BMI | 6.753 (2.038, 22.696) | 0.002 | 4.825 (1.388, 16.985) | 0.014 | 4.904 (1.412, 17.249) | 0.013 | 4.750 (1.361, 16.779) | 0.015 |
| HtaW | 0.999 (0.997, 1.001) | 0.344 | 0.998 (0.995, 1.000) | 0.028 | 0.998 (0.995, 1.000) | 0.024 | 0.998 (0.996, 1.000) | 0.029 |
| FMI | 0.070 (0.012, 0.381) | 0.002 | 0.136 (0.023, 0.787) | 0.027 | 0.133 (0.023, 0.767) | 0.025 | 0.139 (0.023, 0.803) | 0.029 |
| FFMI | 0.104 (0.025, 0.435) | 0.002 | 0.147 (0.033, 0.651) | 0.012 | 0.144 (0.032, 0.638) | 0.011 | 0.148 (0.033, 0.658) | 0.012 |
| WWI | 1.088 (0.681, 1.737) | 0.725 | 1.145 (0.707, 1.855) | 0.583 | 1.140 (0.704, 1.849) | 0.594 | 1.111 (0.685, 1.801) | 0.669 |
| AIP | 0.197 (0.080, 0.480) | <0.001 | 0.356 (0.143, 0.884) | 0.026 | 0.361 (0.144, 0.895) | 0.028 | 0.330 (0.106, 1.011) | 0.054 |
| LAP | 0.990 (0.980, 1.000) | 0.059 | 0.999 (0.989, 1.010) | 0.880 | 0.999 (0.989, 1.010) | 0.886 | 0.998 (0.988, 1.009) | 0.741 |
| VAI | 0.606 (0.457, 0.796) | <0.001 | 1.046 (0.738, 1.473) | 0.799 | 1.047 (0.739, 1.475) | 0.793 | 1.066 (0.752, 1.502) | 0.715 |
| TyG | 4.534 (3.184, 6.498) | <0.001 | 2.530 (1.737, 3.702) | <0.001 | 2.514 (1.725, 3.678) | <0.001 | 2.471 (1.569, 3.929) | <0.001 |
| BRI | 1.287 (0.745, 2.230) | 0.367 | 0.925 (0.527, 1.628) | 0.787 | 0.930 (0.529, 1.636) | 0.800 | 0.953 (0.543, 1.678) | 0.868 |
| CMI | 4.444 (1.811, 11.570) | 0.002 | 0.716 (0.242, 2.191) | 0.549 | 0.711 (0.240, 2.179) | 0.542 | 0.755 (0.254, 2.328) | 0.616 |
| Hypertension (reference= normotension, N = 3898) | | | | | | | | |
| Height | 0.857 (0.764, 0.959) | 0.008 | 0.878 (0.772, 0.996) | 0.044 | 0.880 (0.775, 0.999) | 0.049 | 0.884 (0.778, 1.003) | 0.057 |
| WC | 1.100 (0.844, 1.430) | 0.479 | 1.134 (0.840, 1.521) | 0.407 | 1.129 (0.837, 1.516) | 0.421 | 1.090 (0.809, 1.462) | 0.569 |
| FM | 1.173 (0.735, 1.852) | 0.498 | 0.998 (0.600, 1.646) | 0.995 | 1.017 (0.613, 1.669) | 0.948 | 0.970 (0.584, 1.587) | 0.902 |
| BFP | 0.950 (0.916, 0.986) | 0.006 | 0.966 (0.925, 1.009) | 0.111 | 0.964 (0.924, 1.007) | 0.093 | 0.961 (0.921, 1.004) | 0.073 |
| VFI | 1.143 (1.064, 1.229) | <0.001 | 1.020 (0.938, 1.110) | 0.647 | 1.021 (0.938, 1.110) | 0.634 | 1.015 (0.932, 1.104) | 0.738 |
| BMR | 1.000 (0.999, 1.001) | 0.738 | 1.001 (0.999, 1.002) | 0.221 | 1.001 (1.000, 1.002) | 0.184 | 1.001 (0.999, 1.002) | 0.305 |
| BMI | 0.643 (0.233, 1.761) | 0.393 | 0.746 (0.246, 2.251) | 0.602 | 0.767 (0.255, 2.298) | 0.635 | 0.693 (0.227, 2.085) | 0.515 |
| HtaW | 1.004 (1.002, 1.006) | <0.001 | 0.999 (0.996, 1.001) | 0.353 | 0.999 (0.996, 1.001) | 0.335 | 0.999 (0.996, 1.001) | 0.354 |
| WHtR | 1.100 (0.621, 1.943) | 0.744 | 0.957 (0.507, 1.799) | 0.890 | 0.962 (0.511, 1.807) | 0.905 | 0.958 (0.505, 1.806) | 0.894 |
| FMI | 0.919 (0.264, 3.271) | 0.895 | 1.401 (0.359, 5.606) | 0.627 | 1.338 (0.347, 5.302) | 0.672 | 1.585 (0.413, 6.335) | 0.504 |
| FFMI | 1.333 (0.730, 2.469) | 0.355 | 1.312 (0.679, 2.562) | 0.420 | 1.288 (0.668, 2.507) | 0.451 | 1.388 (0.720, 2.722) | 0.331 |
| WWI | 0.986 (0.331, 3.104) | 0.981 | 1.342 (0.407, 4.774) | 0.636 | 1.345 (0.409, 4.812) | 0.634 | 1.542 (0.460, 5.692) | 0.496 |
| AIP | 0.030 (0.011, 0.078) | <0.001 | 0.129 (0.043, 0.367) | <0.001 | 0.135 (0.046, 0.386) | <0.001 | 0.064 (0.016, 0.236) | <0.001 |
| LAP | 0.973 (0.963, 0.981) | <0.001 | 0.993 (0.982, 1.005) | 0.234 | 0.993 (0.982, 1.005) | 0.236 | 0.996 (0.983, 1.009) | 0.550 |
| VAI | 0.508 (0.375, 0.680) | <0.001 | 1.198 (0.840, 1.710) | 0.311 | 1.180 (0.828, 1.681) | 0.351 | 1.258 (0.867, 1.843) | 0.229 |
| TyG | 18.328 (12.213, 27.781) | <0.001 | 5.208 (3.271, 8.365) | <0.001 | 5.026 (3.153, 8.080) | <0.001 | 6.141 (3.531, 10.838) | <0.001 |
| BRI | 0.930 (0.345, 2.566) | 0.888 | 0.529 (0.180, 1.586) | 0.251 | 0.529 (0.180, 1.590) | 0.252 | 0.596 (0.201, 1.818) | 0.357 |
| CMI | 15.498 (5.787, 44.695) | <0.001 | 0.705 (0.244, 2.277) | 0.536 | 0.741 (0.256, 2.400) | 0.596 | 0.670 (0.221, 2.258) | 0.497 |
| 1. Excluding extreme values of weight, BMI, HtaW, FMI, FFMI, AIP, and TyG (outside the range of mean ± 3×standard deviation/ median ± 3×median absolute error) | | | | | | | | |
| Pre-hypertension (reference= normotension, N = 5413) | | | | | | | | |
| Weight | 2.950 (1.659, 5.276) | <0.001 | 2.668 (1.465, 4.887) | 0.001 | 2.578 (1.414, 4.728) | 0.002 | 2.593 (1.421, 4.761) | 0.002 |
| FFM | 0.681 (0.495, 0.935) | 0.018 | 0.755 (0.543, 1.046) | 0.092 | 0.756 (0.544, 1.049) | 0.095 | 0.760 (0.546, 1.054) | 0.101 |
| VFI | 1.041 (0.989, 1.096) | 0.127 | 1.012 (0.961, 1.066) | 0.648 | 1.014 (0.963, 1.069) | 0.591 | 1.012 (0.960, 1.066) | 0.659 |
| BMR | 0.999 (0.998, 1.000) | 0.151 | 0.999 (0.997, 1.000) | 0.141 | 0.999 (0.998, 1.000) | 0.160 | 0.999 (0.997, 1.000) | 0.136 |
| BMI | 7.065 (2.317, 21.701) | 0.001 | 6.856 (2.132, 22.211) | 0.001 | 6.282 (1.947, 20.411) | 0.002 | 6.361 (1.967, 20.722) | 0.002 |
| HtaW | 1.000 (0.997, 1.002) | 0.667 | 0.998 (0.995, 1.000) | 0.046 | 0.998 (0.995, 1.000) | 0.052 | 0.998 (0.995, 1.000) | 0.052 |
| FMI | 0.051 (0.010, 0.252) | <0.001 | 0.067 (0.012, 0.360) | 0.002 | 0.075 (0.014, 0.401) | 0.003 | 0.074 (0.013, 0.396) | 0.002 |
| FFMI | 0.106 (0.028, 0.396) | 0.001 | 0.109 (0.027, 0.433) | 0.002 | 0.121 (0.030, 0.481) | 0.003 | 0.118 (0.029, 0.470) | 0.003 |
| WWI | 1.010 (0.666, 1.528) | 0.961 | 1.117 (0.725, 1.714) | 0.613 | 1.116 (0.724, 1.712) | 0.619 | 1.097 (0.712, 1.684) | 0.673 |
| AIP | 0.184 (0.082, 0.413) | <0.001 | 0.299 (0.130, 0.682) | 0.004 | 0.322 (0.140, 0.737) | 0.008 | 0.292 (0.105, 0.807) | 0.018 |
| LAP | 0.986 (0.977, 0.995) | 0.003 | 0.999 (0.989, 1.009) | 0.826 | 0.999 (0.989, 1.009) | 0.870 | 0.999 (0.988, 1.009) | 0.777 |
| VAI | 0.567 (0.447, 0.714) | <0.001 | 1.013 (0.754, 1.360) | 0.932 | 0.975 (0.724, 1.311) | 0.867 | 0.983 (0.730, 1.322) | 0.909 |
| TyG | 4.890 (3.605, 6.663) | <0.001 | 2.756 (1.998, 3.817) | <0.001 | 2.698 (1.954, 3.740) | <0.001 | 2.708 (1.837, 4.022) | <0.001 |
| BRI | 1.444 (0.887, 2.367) | 0.142 | 0.956 (0.578, 1.593) | 0.861 | 0.956 (0.578, 1.595) | 0.863 | 0.970 (0.586, 1.618) | 0.906 |
| CMI | 5.425 (2.673, 11.232) | <0.001 | 0.813 (0.332, 2.015) | 0.651 | 0.893 (0.365, 2.222) | 0.807 | 0.950 (0.386, 2.374) | 0.912 |
| 1. Excluding extreme values of FM, AIP, and TyG (outside the range of mean ± 3×standard deviation/ median ± 3×median absolute error) | | | | | | | | |
| Hypertension (reference= normotension, N = 5597) | | | | | | | | |
| Height | 0.935 (0.855, 1.023) | 0.142 | 0.937 (0.846, 1.037) | 0.212 | 0.941 (0.849, 1.041) | 0.237 | 0.936 (0.845, 1.036) | 0.205 |
| WC | 0.921 (0.748, 1.133) | 0.438 | 0.917 (0.726, 1.154) | 0.462 | 0.938 (0.742, 1.183) | 0.592 | 0.923 (0.730, 1.164) | 0.500 |
| FM | 1.264 (0.857, 1.878) | 0.241 | 1.034 (0.666, 1.589) | 0.880 | 1.094 (0.705, 1.681) | 0.685 | 1.043 (0.670, 1.607) | 0.850 |
| BFP | 0.957 (0.927, 0.989) | 0.008 | 0.992 (0.957, 1.028) | 0.647 | 0.991 (0.956, 1.028) | 0.639 | 0.993 (0.957, 1.030) | 0.703 |
| VFI | 1.085 (1.020, 1.154) | 0.010 | 0.996 (0.931, 1.065) | 0.902 | 1.002 (0.936, 1.071) | 0.964 | 0.991 (0.925, 1.060) | 0.792 |
| BMR | 0.998 (0.996, 1.000) | 0.014 | 1.000 (0.998, 1.001) | 0.702 | 1.000 (0.998, 1.001) | 0.800 | 1.000 (0.998, 1.001) | 0.641 |
| BMI | 0.630 (0.272, 1.471) | 0.283 | 0.590 (0.228, 1.517) | 0.274 | 0.694 (0.268, 1.788) | 0.451 | 0.627 (0.240, 1.628) | 0.339 |
| HtaW | 1.002 (1.001, 1.004) | 0.001 | 0.998 (0.997, 1.000) | 0.063 | 0.998 (0.997, 1.000) | 0.064 | 0.999 (0.997, 1.000) | 0.084 |
| WHtR | 1.172 (0.719, 1.910) | 0.524 | 1.089 (0.637, 1.846) | 0.753 | 1.023 (0.597, 1.739) | 0.932 | 1.003 (0.582, 1.714) | 0.990 |
| FMI | 0.927 (0.316, 2.679) | 0.890 | 1.647 (0.510, 5.515) | 0.411 | 1.358 (0.420, 4.539) | 0.614 | 1.607 (0.493, 5.429) | 0.438 |
| FFMI | 1.512 (0.905, 2.530) | 0.115 | 1.700 (0.962, 3.039) | 0.071 | 1.538 (0.870, 2.753) | 0.143 | 1.667 (0.938, 3.001) | 0.085 |
| WWI | 1.619 (0.552, 4.896) | 0.387 | 2.272 (0.737, 7.669) | 0.167 | 2.365 (0.761, 8.065) | 0.151 | 2.730 (0.854, 9.585) | 0.102 |
| AIP | 0.033 (0.014, 0.079) | <0.001 | 0.125 (0.047, 0.329) | <0.001 | 0.151 (0.056, 0.401) | <0.001 | 0.087 (0.027, 0.278) | <0.001 |
| LAP | 0.973 (0.965, 0.982) | <0.001 | 0.996 (0.986, 1.007) | 0.458 | 0.996 (0.985, 1.006) | 0.412 | 0.996 (0.986, 1.008) | 0.512 |
| VAI | 0.432 (0.340, 0.546) | <0.001 | 1.064 (0.761, 1.492) | 0.719 | 1.049 (0.750, 1.473) | 0.781 | 1.099 (0.781, 1.552) | 0.588 |
| TyG | 17.502 (12.568, 24.534) | <0.001 | 5.649 (3.885, 8.265) | <0.001 | 5.251 (3.607, 7.692) | <0.001 | 6.170 (3.956, 9.718) | <0.001 |
| BRI | 1.623 (0.651, 4.079) | 0.301 | 0.825 (0.310, 2.240) | 0.703 | 0.907 (0.339, 2.478) | 0.848 | 0.964 (0.358, 2.658) | 0.943 |
| CMI | 19.761 (9.144, 43.881) | <0.001 | 0.881 (0.327, 2.421) | 0.804 | 0.901 (0.333, 2.482) | 0.839 | 0.862 (0.312, 2.429) | 0.777 |

**Notes:** Model 1 was not adjusted; Model 2 adjusted for age, gender, current residence, educational level, annual household income per capita, occupation, medical insurance, household size, marital status; Model 3 adjusted for age, gender, current residence, educational level, annual household income per capita, occupation, medical insurance, household size, marital status, smoking, drinking, regular sleep; Model 4 adjusted for age, gender, current residence, educational level, annual household income per capita, occupation, medical insurance, household size, marital status, smoking, drinking, regular sleep, family history of hypertension, family history of cardiovascular diseases, TC, LDL-C, UA (FBG, TG, and HDL-C were included in the calculation formulas of some anthropometric indicators and did not need to be adjusted). The first sensitivity analysis did not need to adjust for family history of hypertension or family history of cardiovascular diseases, and the second sensitivity analysis did not need to adjust for smoking or drinking.


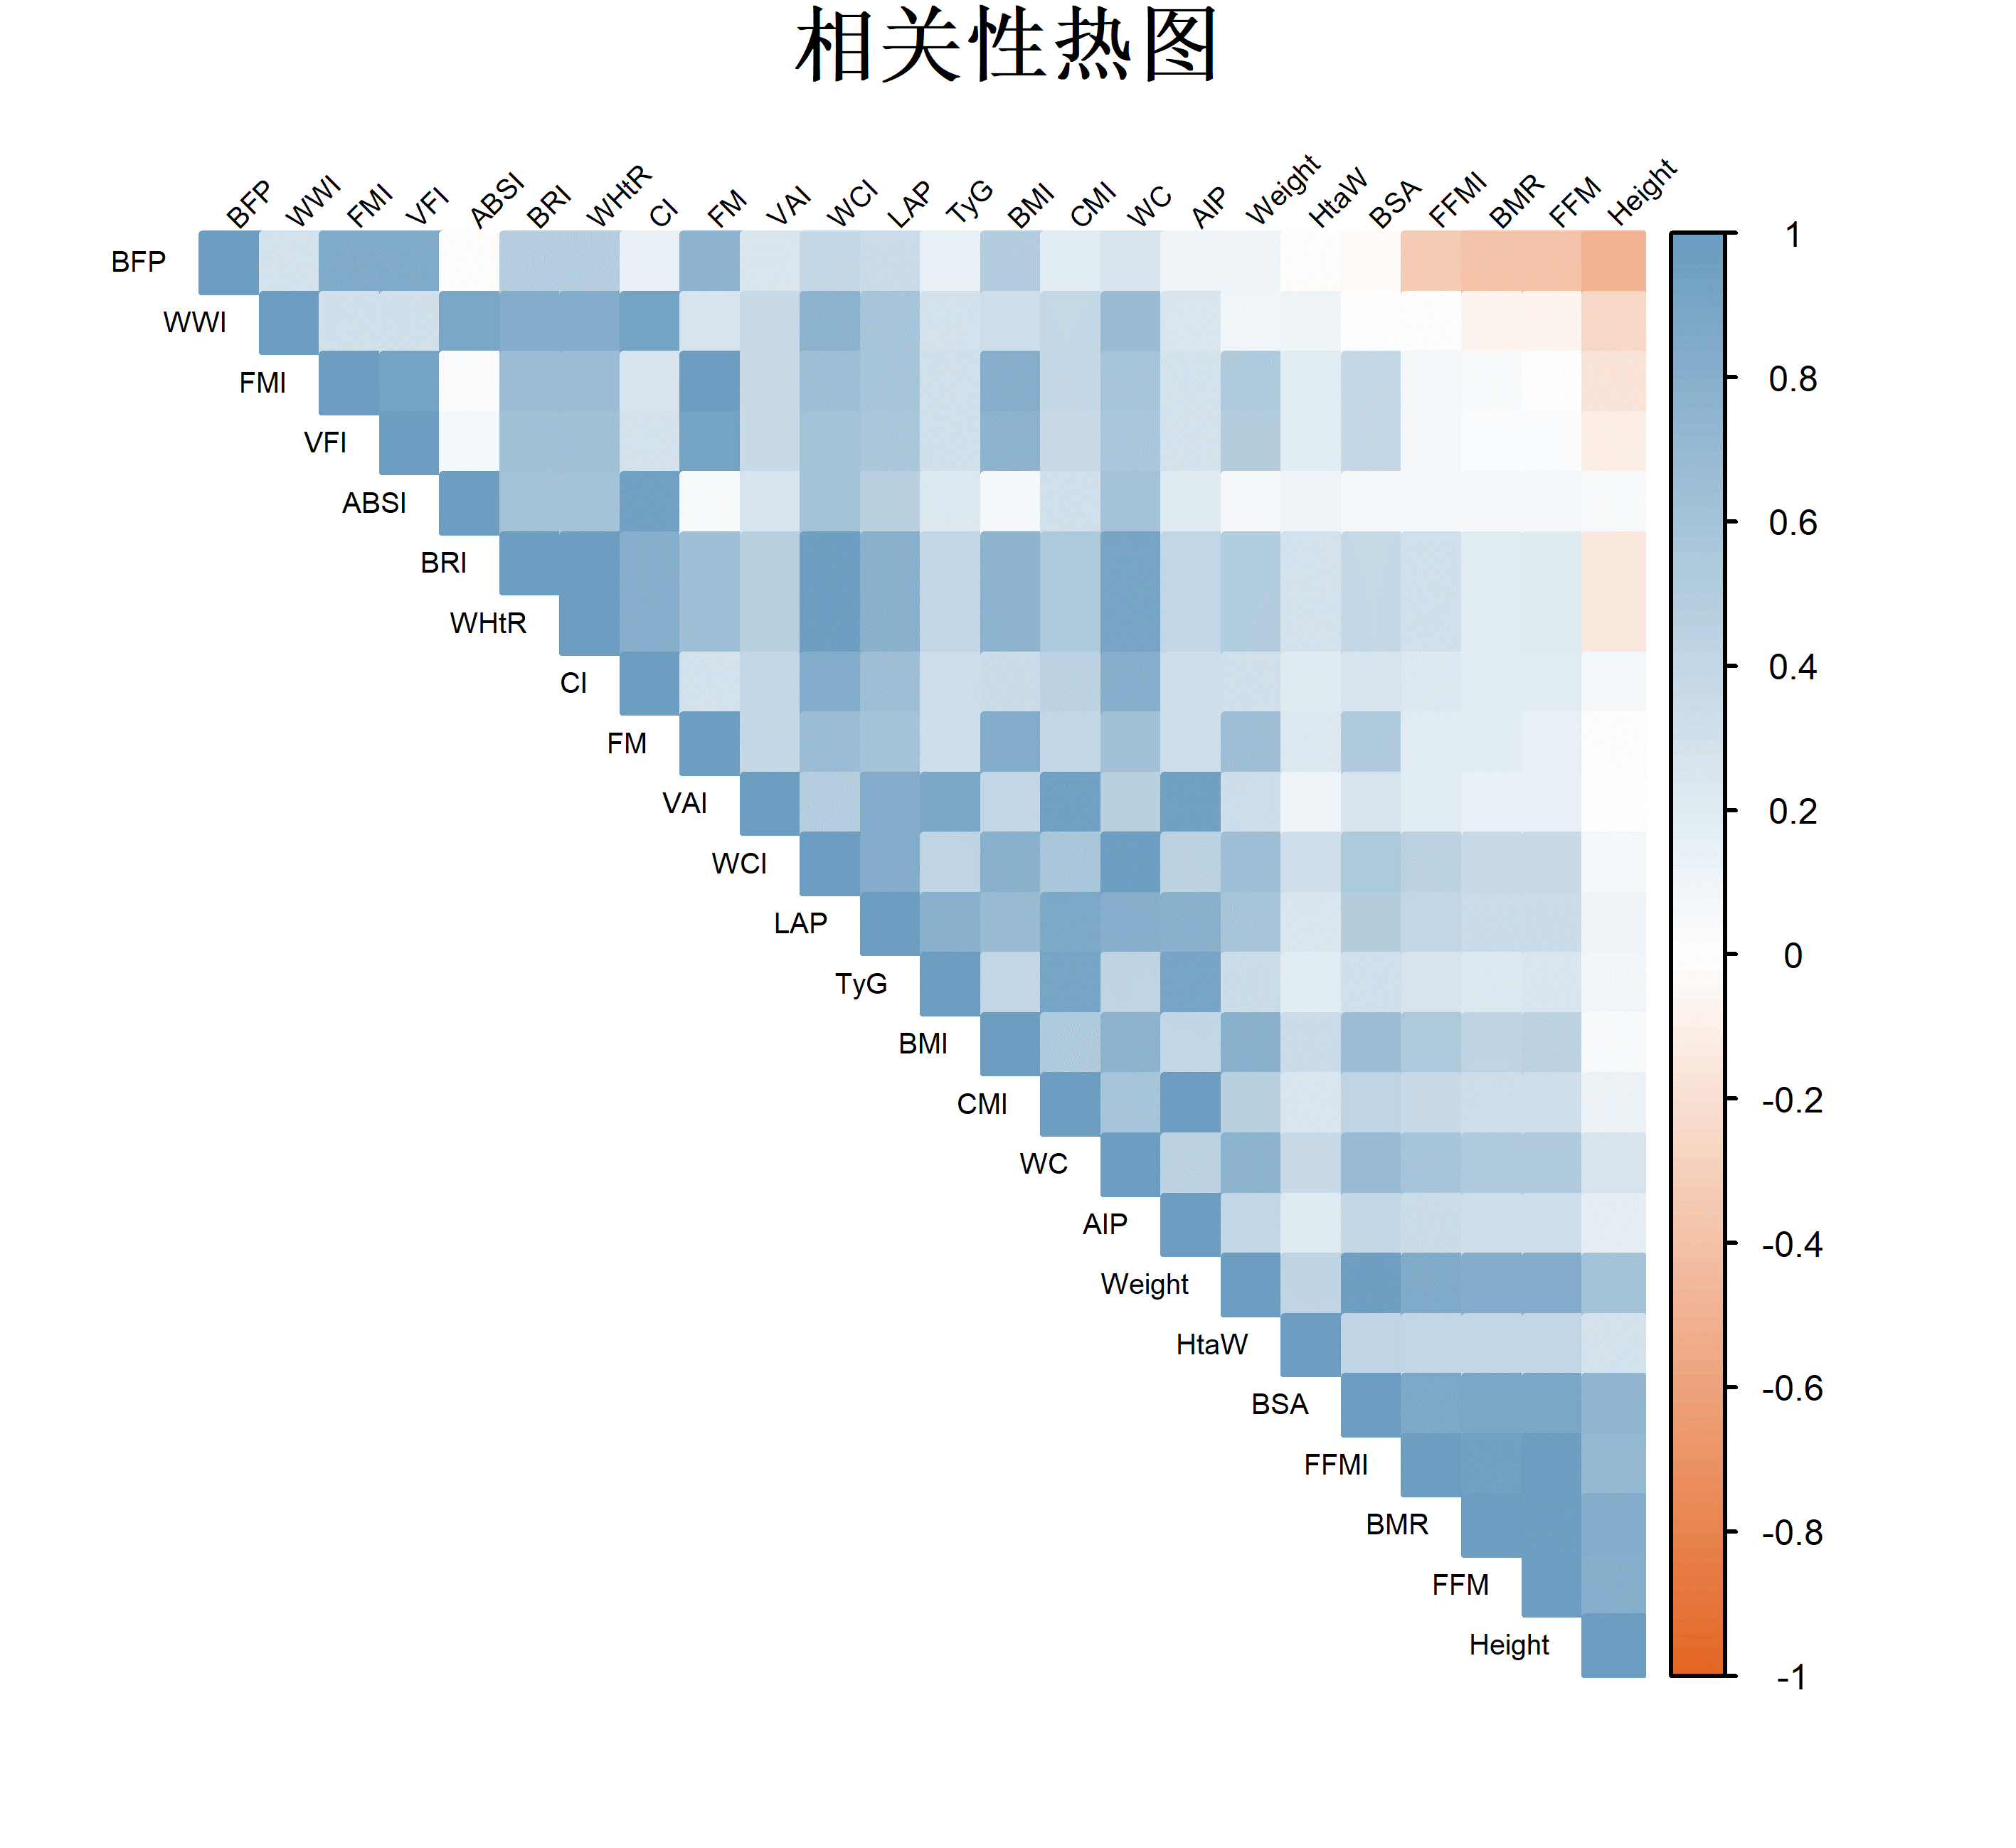


**Supplementary Figure 1** Heat map of the conventional and unconventional anthropometric parameters

**Abbreviations:** WC, Waist Circumference; FM, Fat Mass; FFM, Fat-Free Mass; BFP, Body Fat Percentage; VFI, Visceral Fat Index; BMR, Basal Metabolic Rate; BMI, Body Mass Index; HtaW, Height-adjusted Weight; WHtR, Waist-Height Ratio; FMI, Fat Mass Index; FFMI, Fat-Free Mass Index; WCI, Waist Circumference Index; WWI, Weight-adjusted-Waist Index; BSA, Body Surface Area; AIP, Atherogenic Index of Plasma; LAP, Lipid Accumulation Product; VAI, Visceral Adiposity Index; TyG, Triglyceride-Glucose Index; CI, Conicity Index; BRI, Body Roundness Index; ABSI, A Body Shape Index; CMI, Cardiometabolic Index.


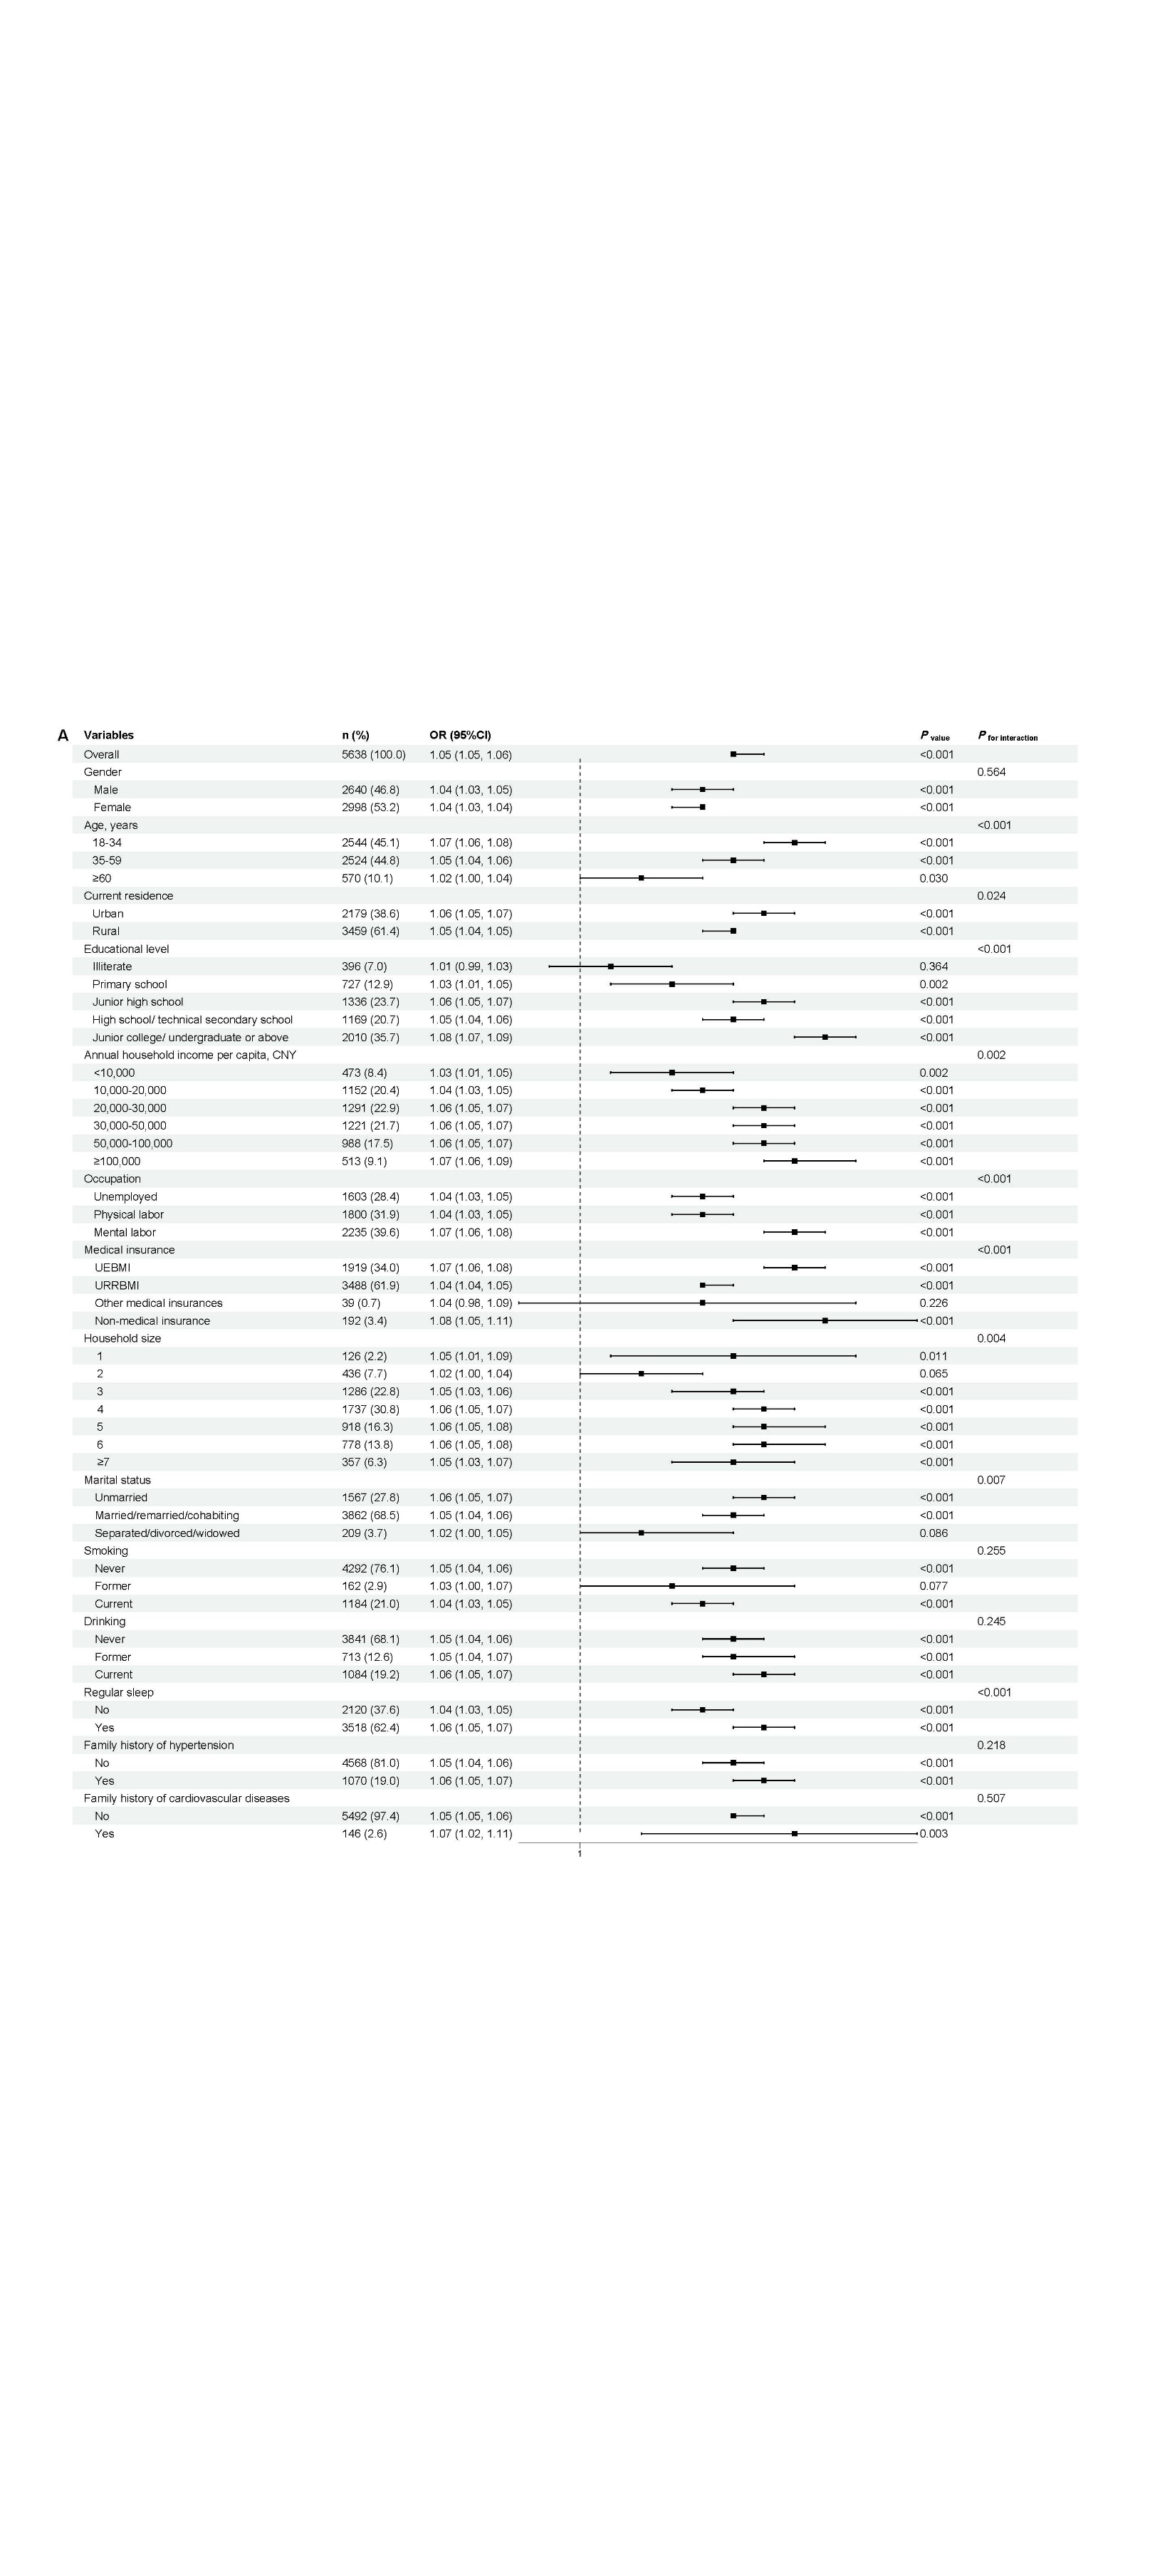


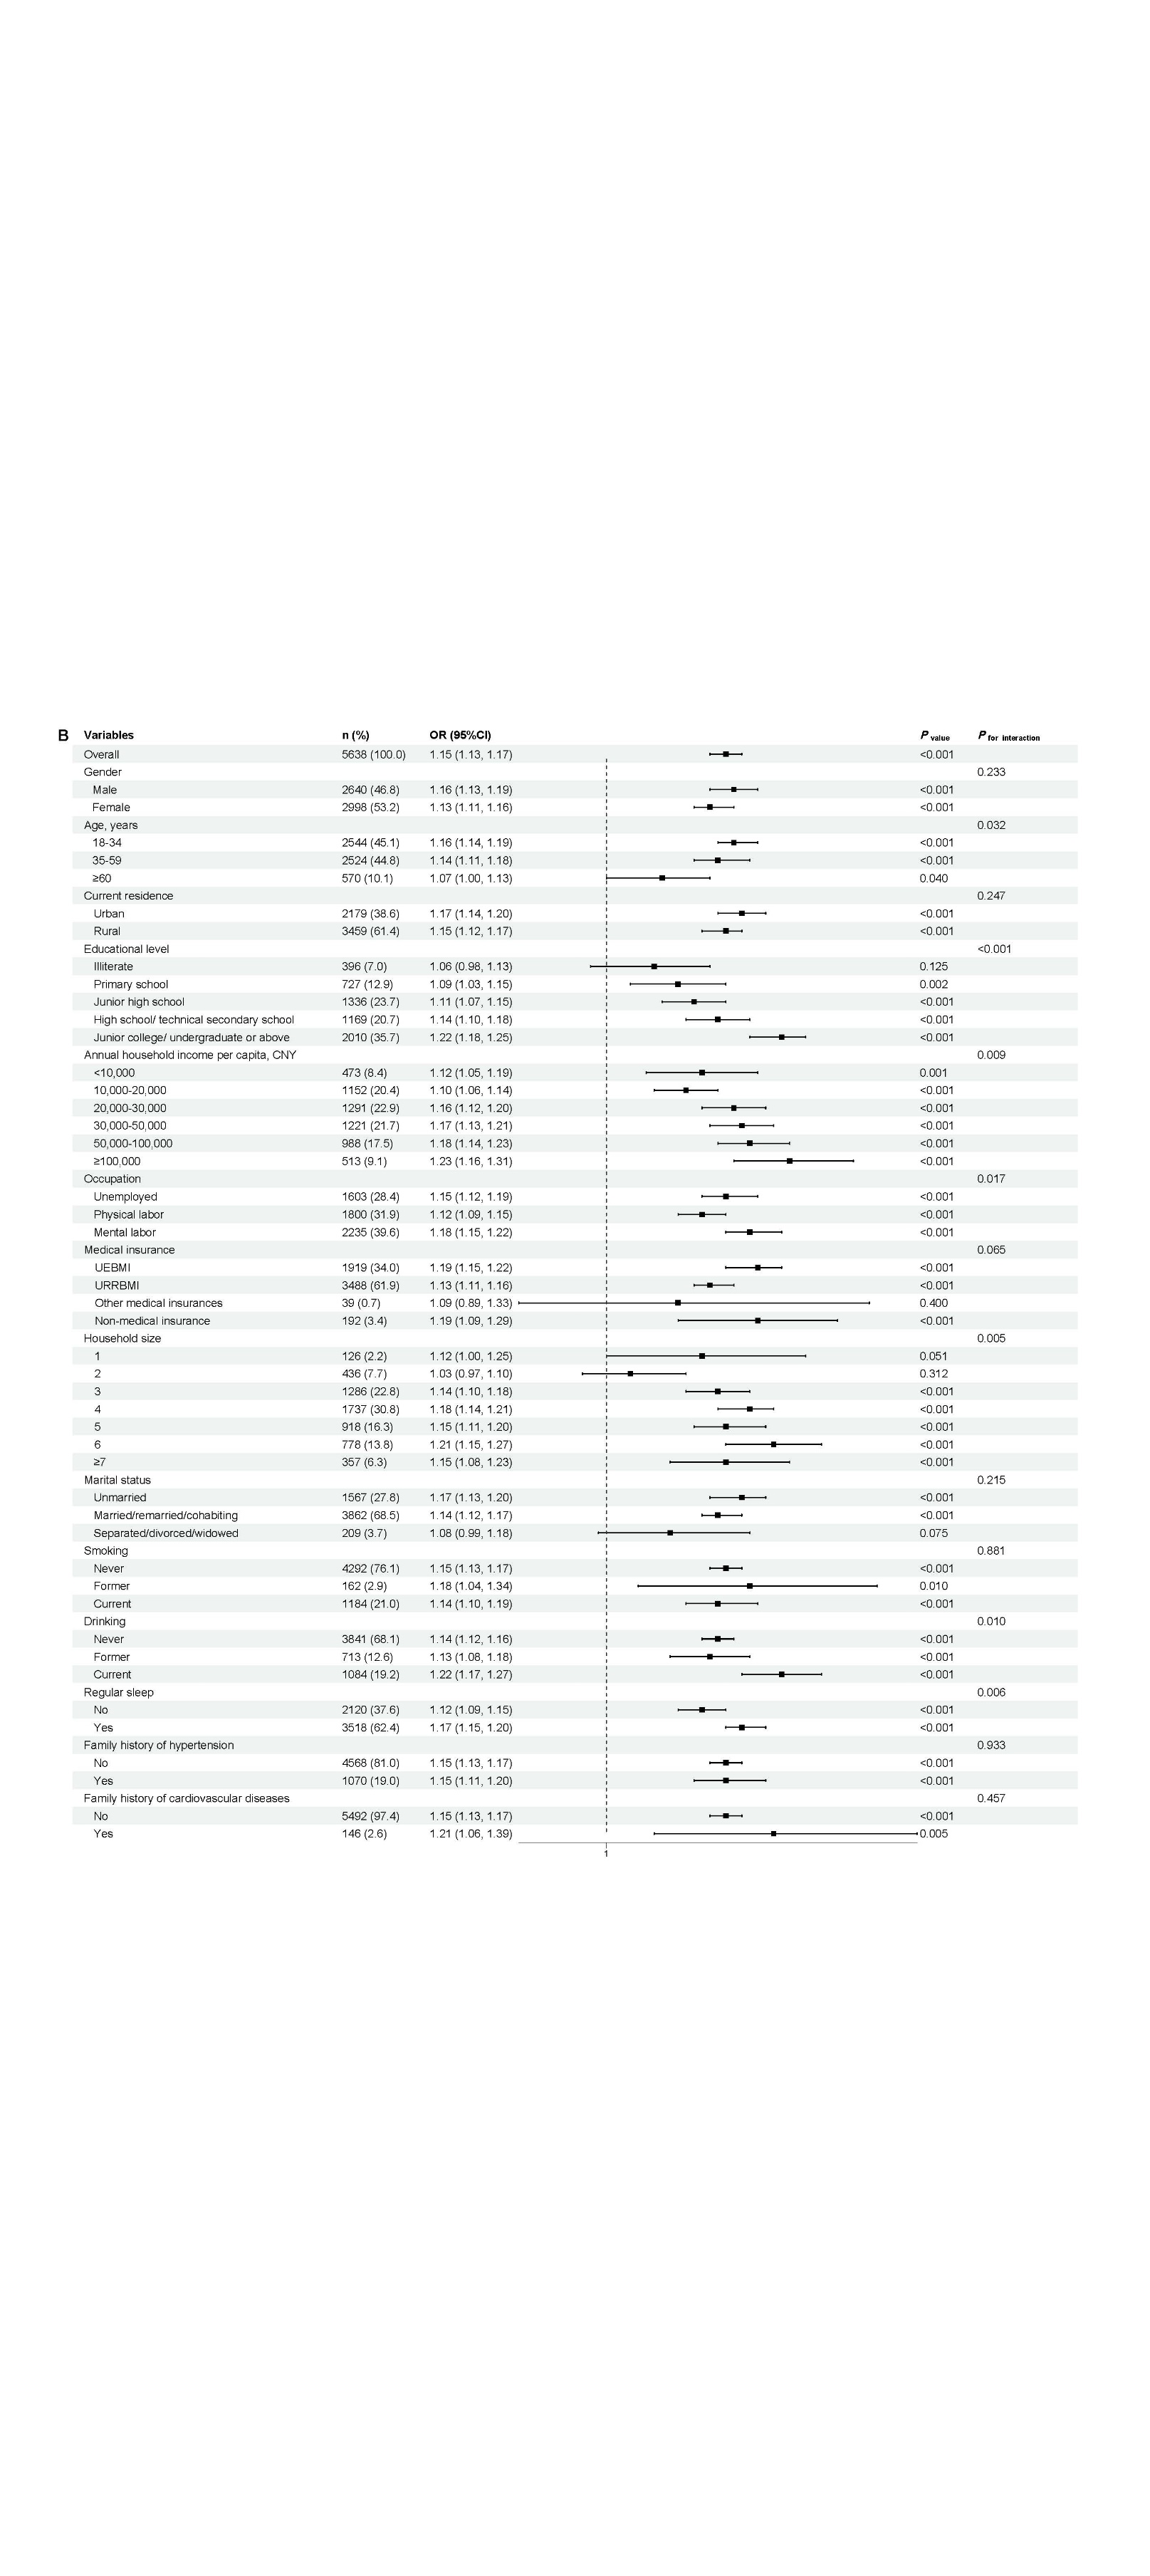


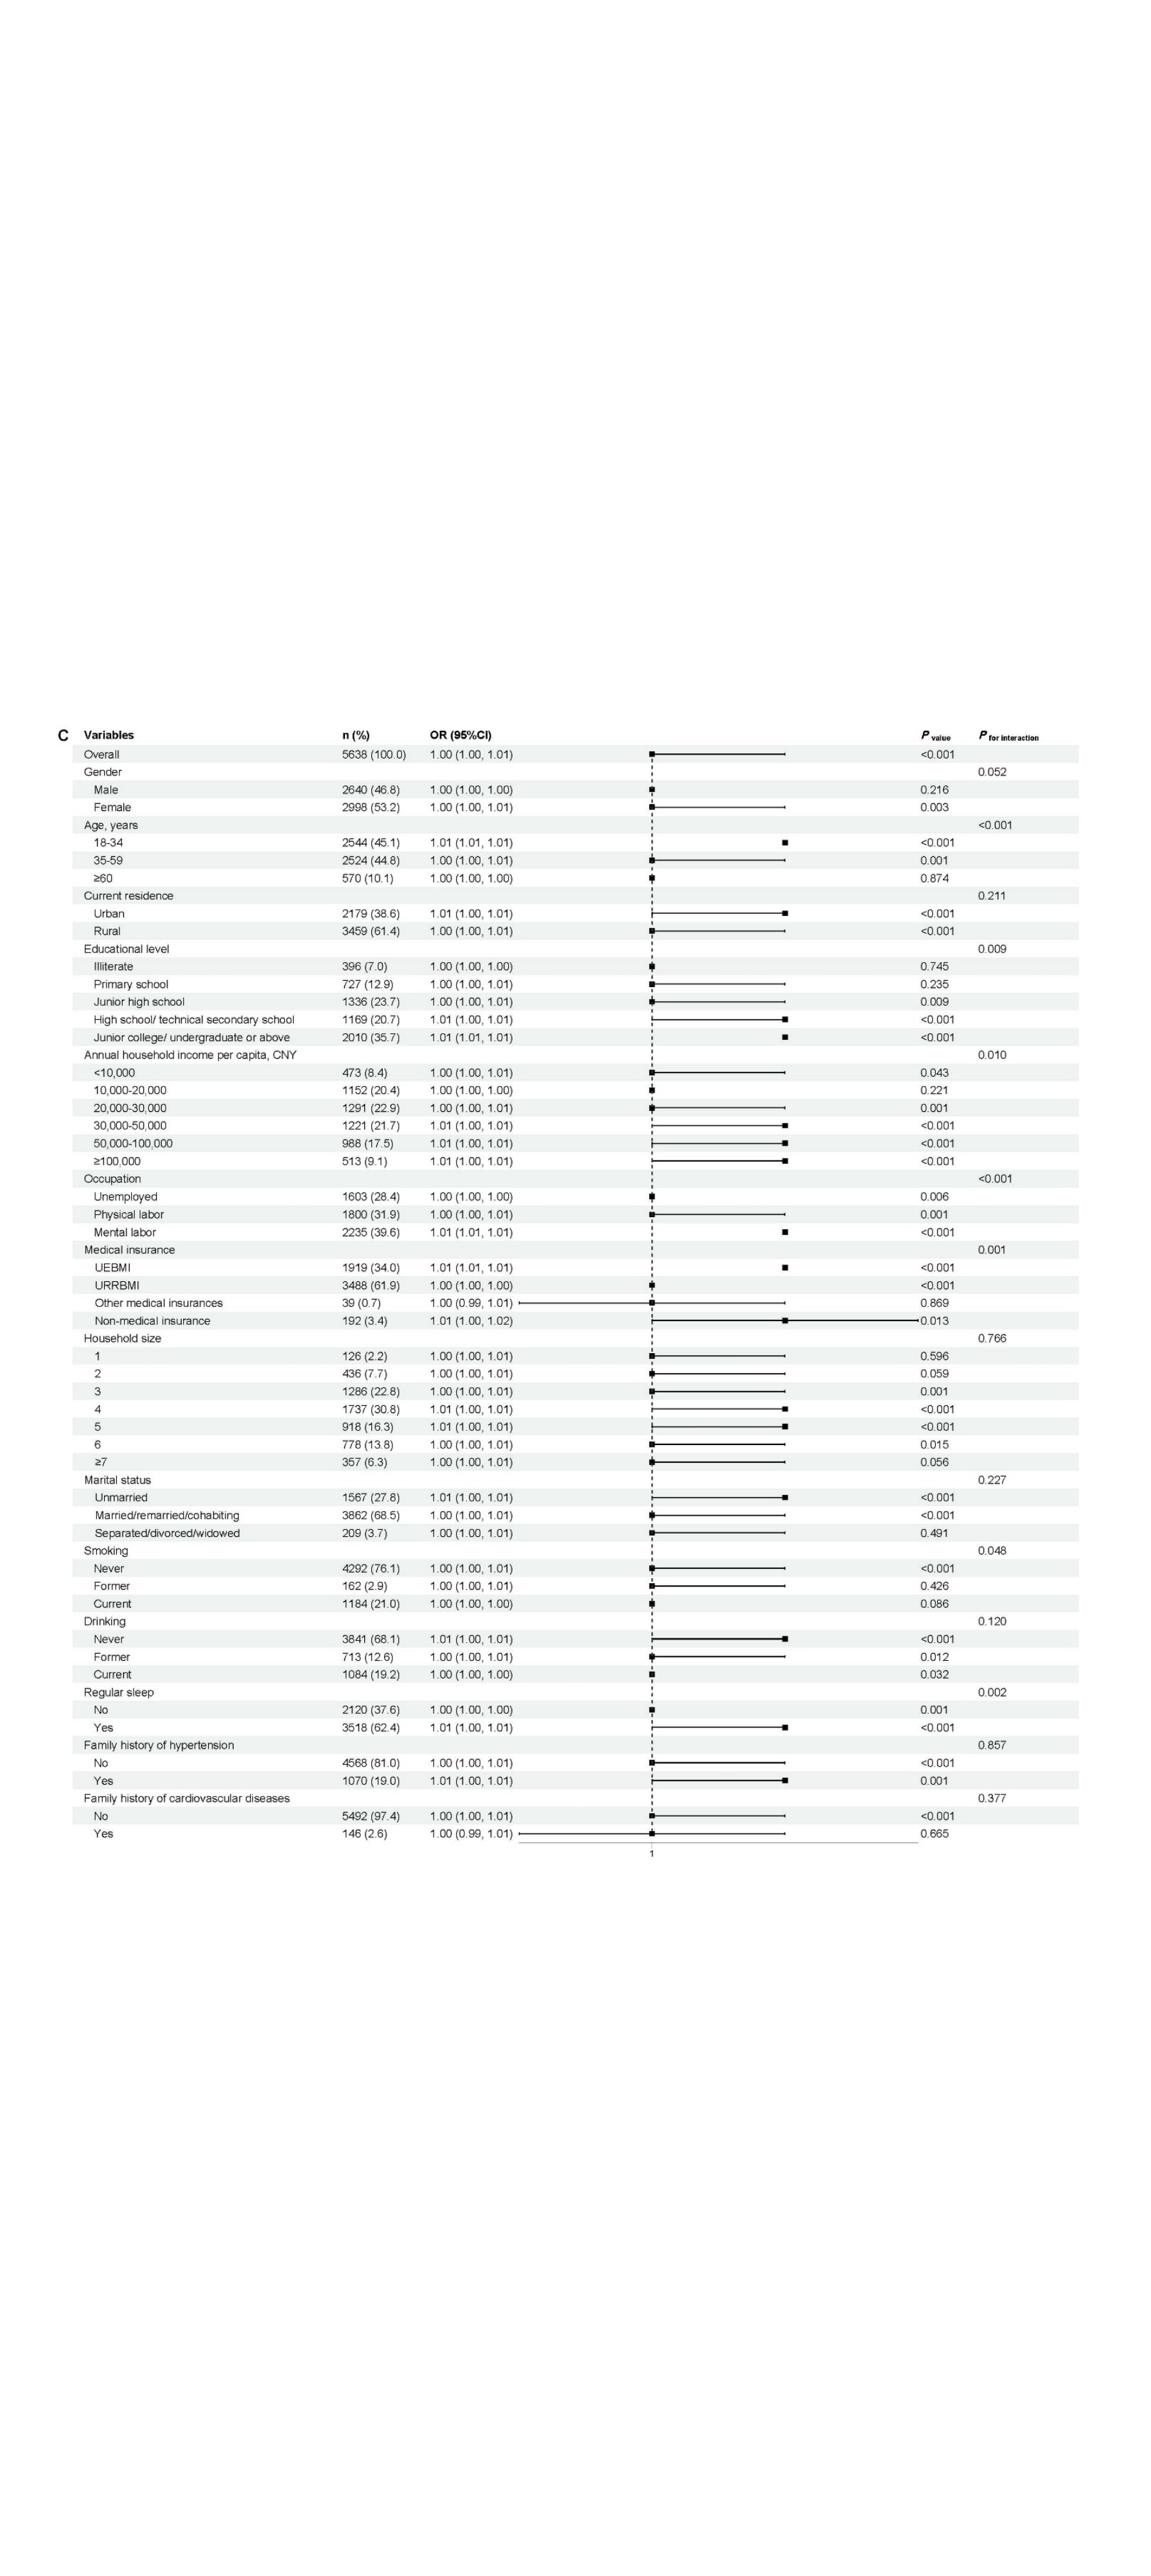


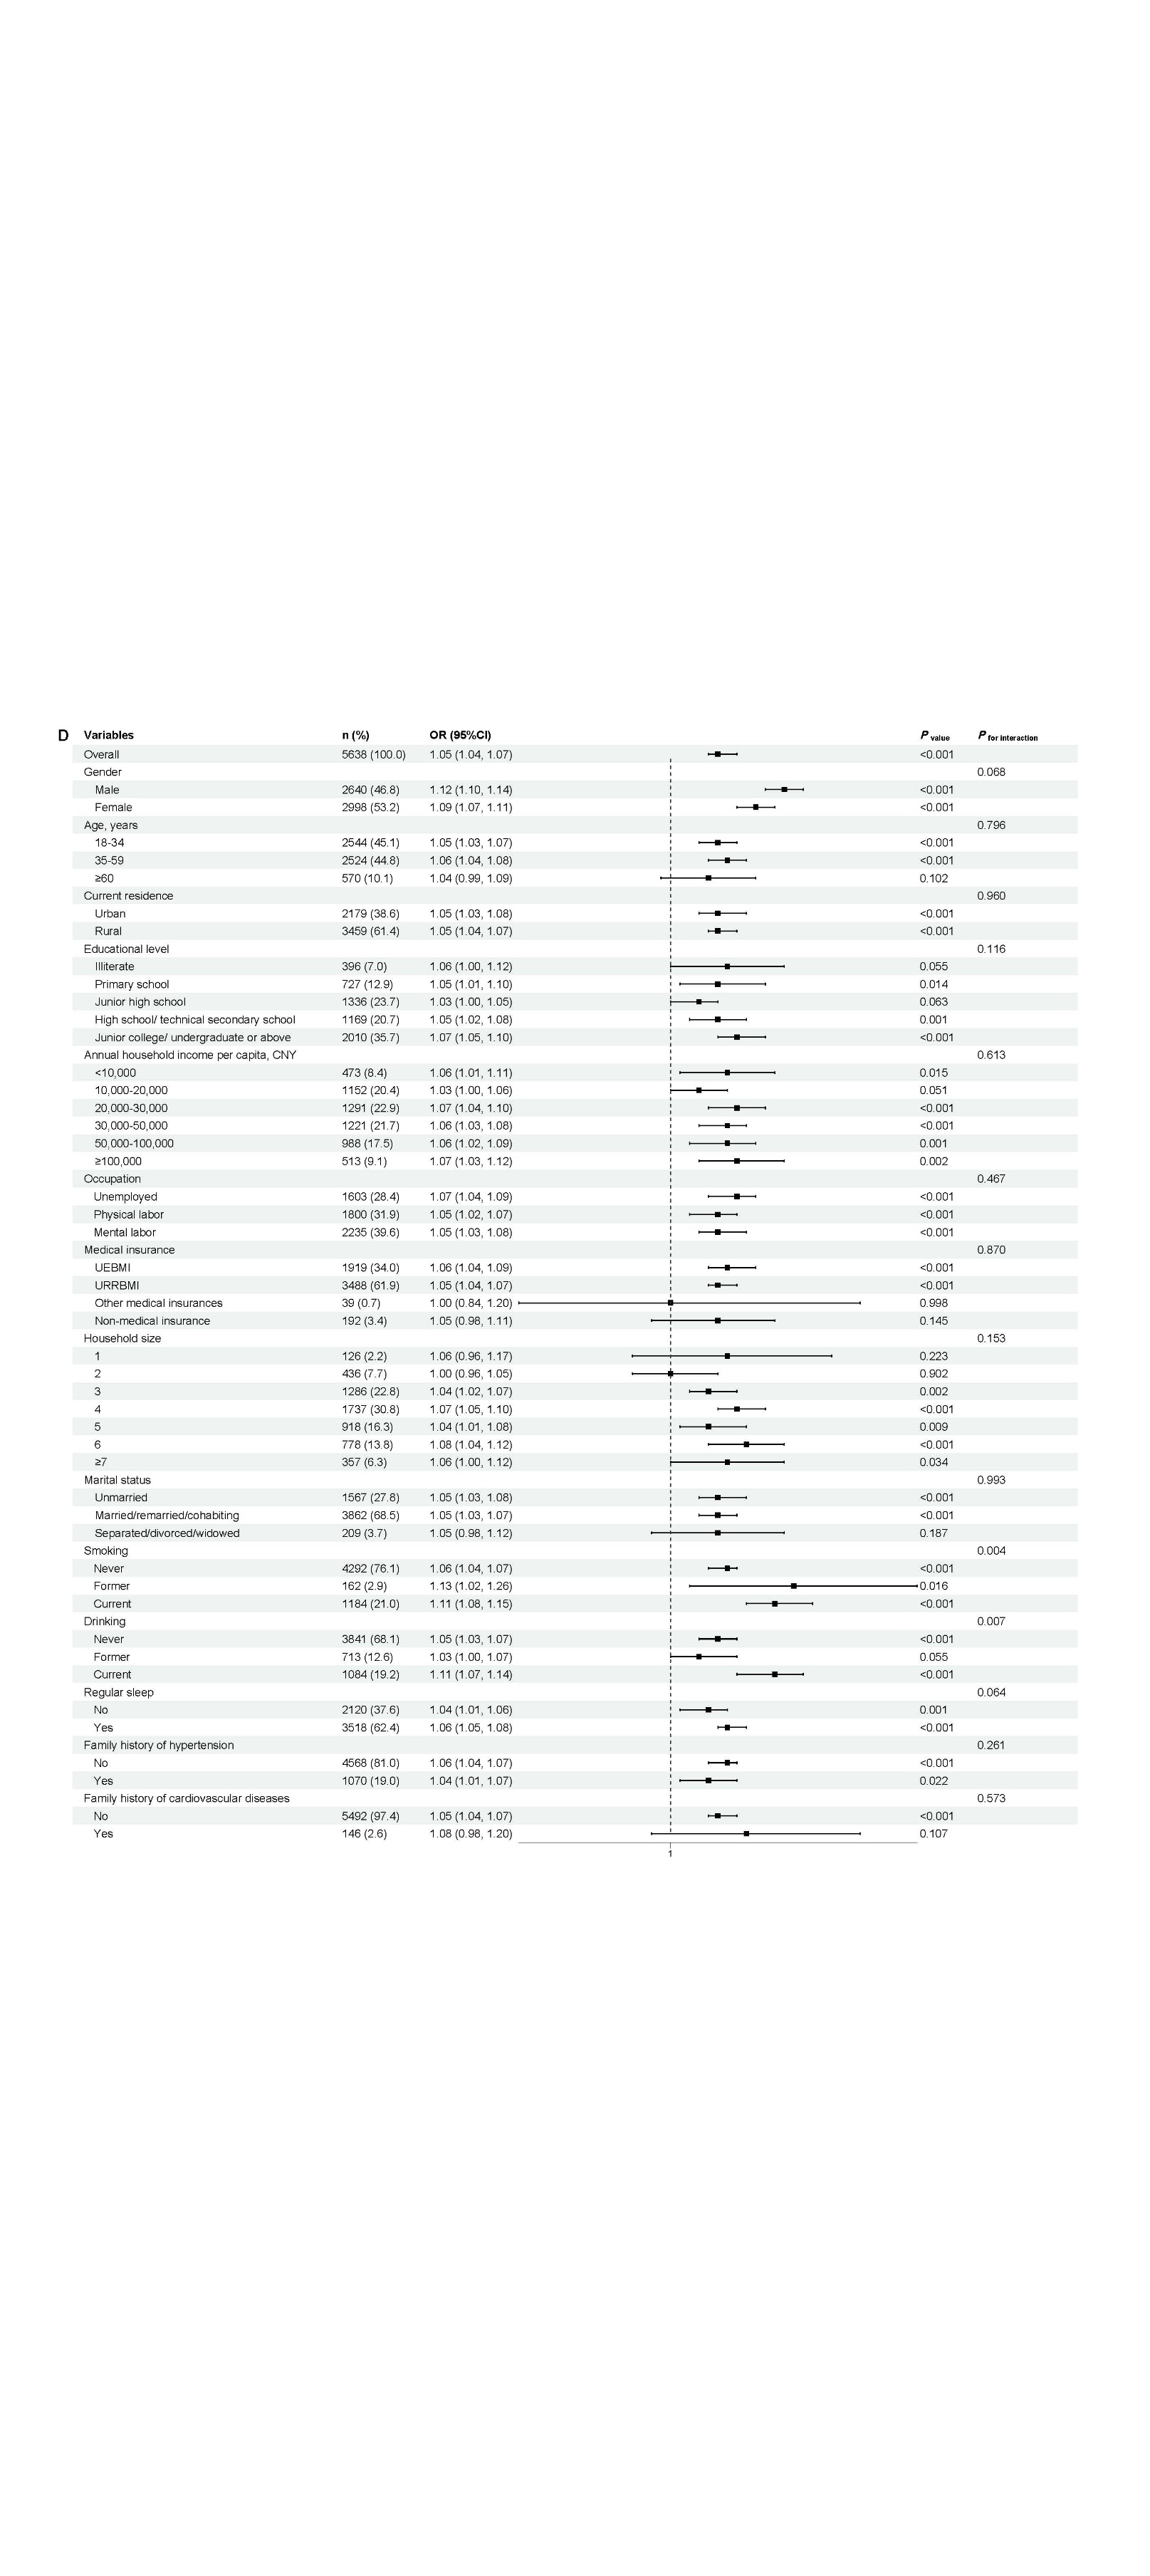


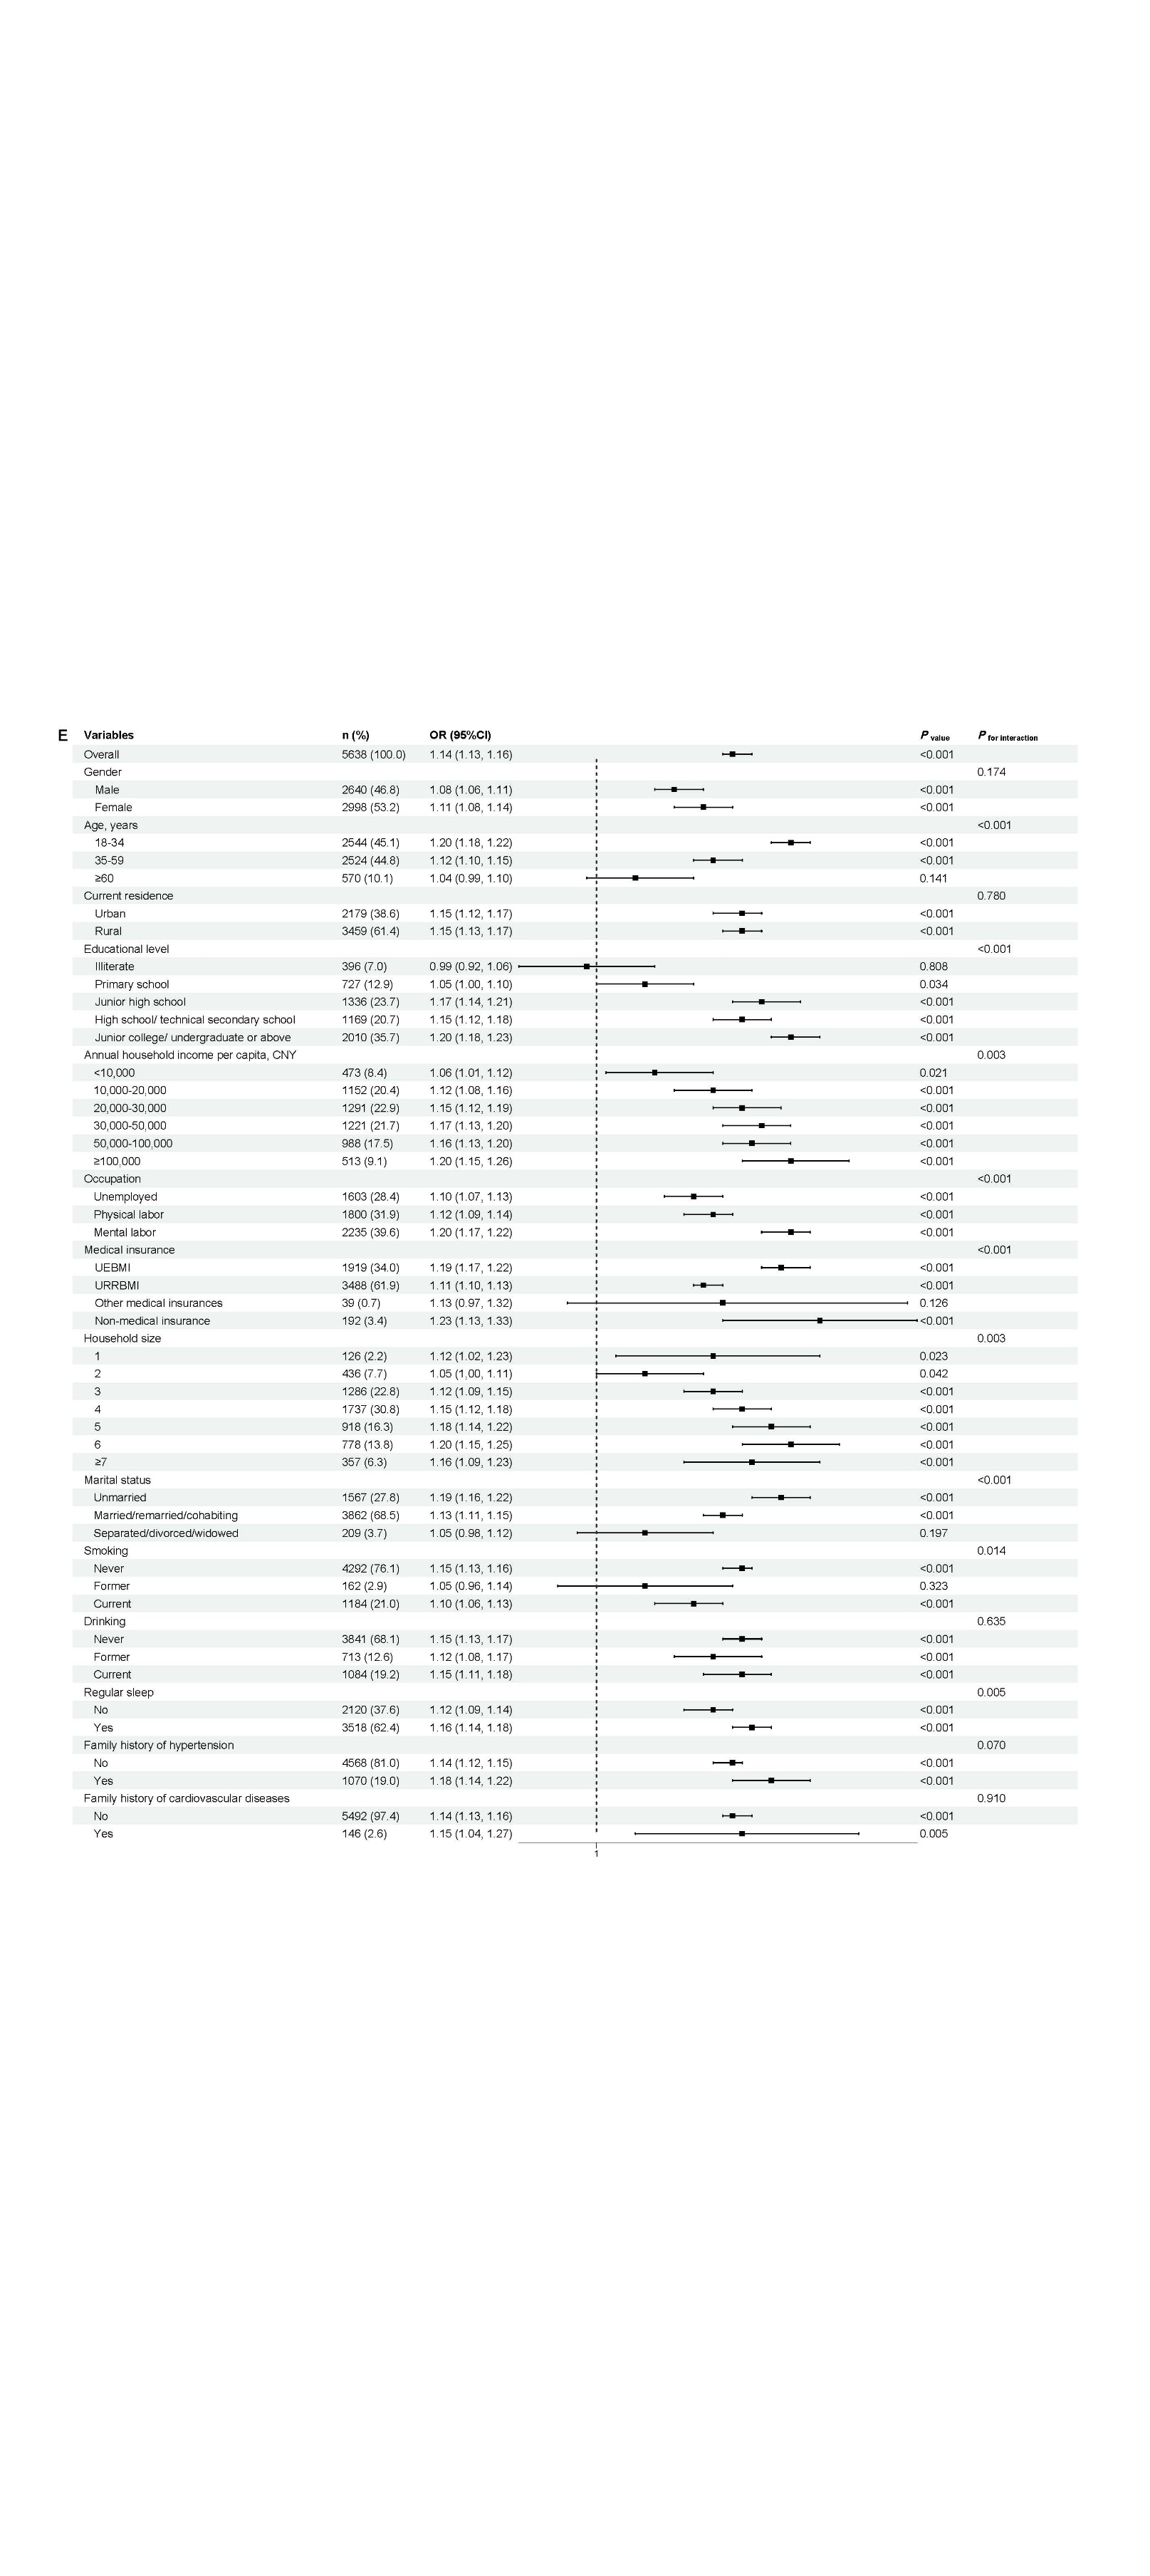


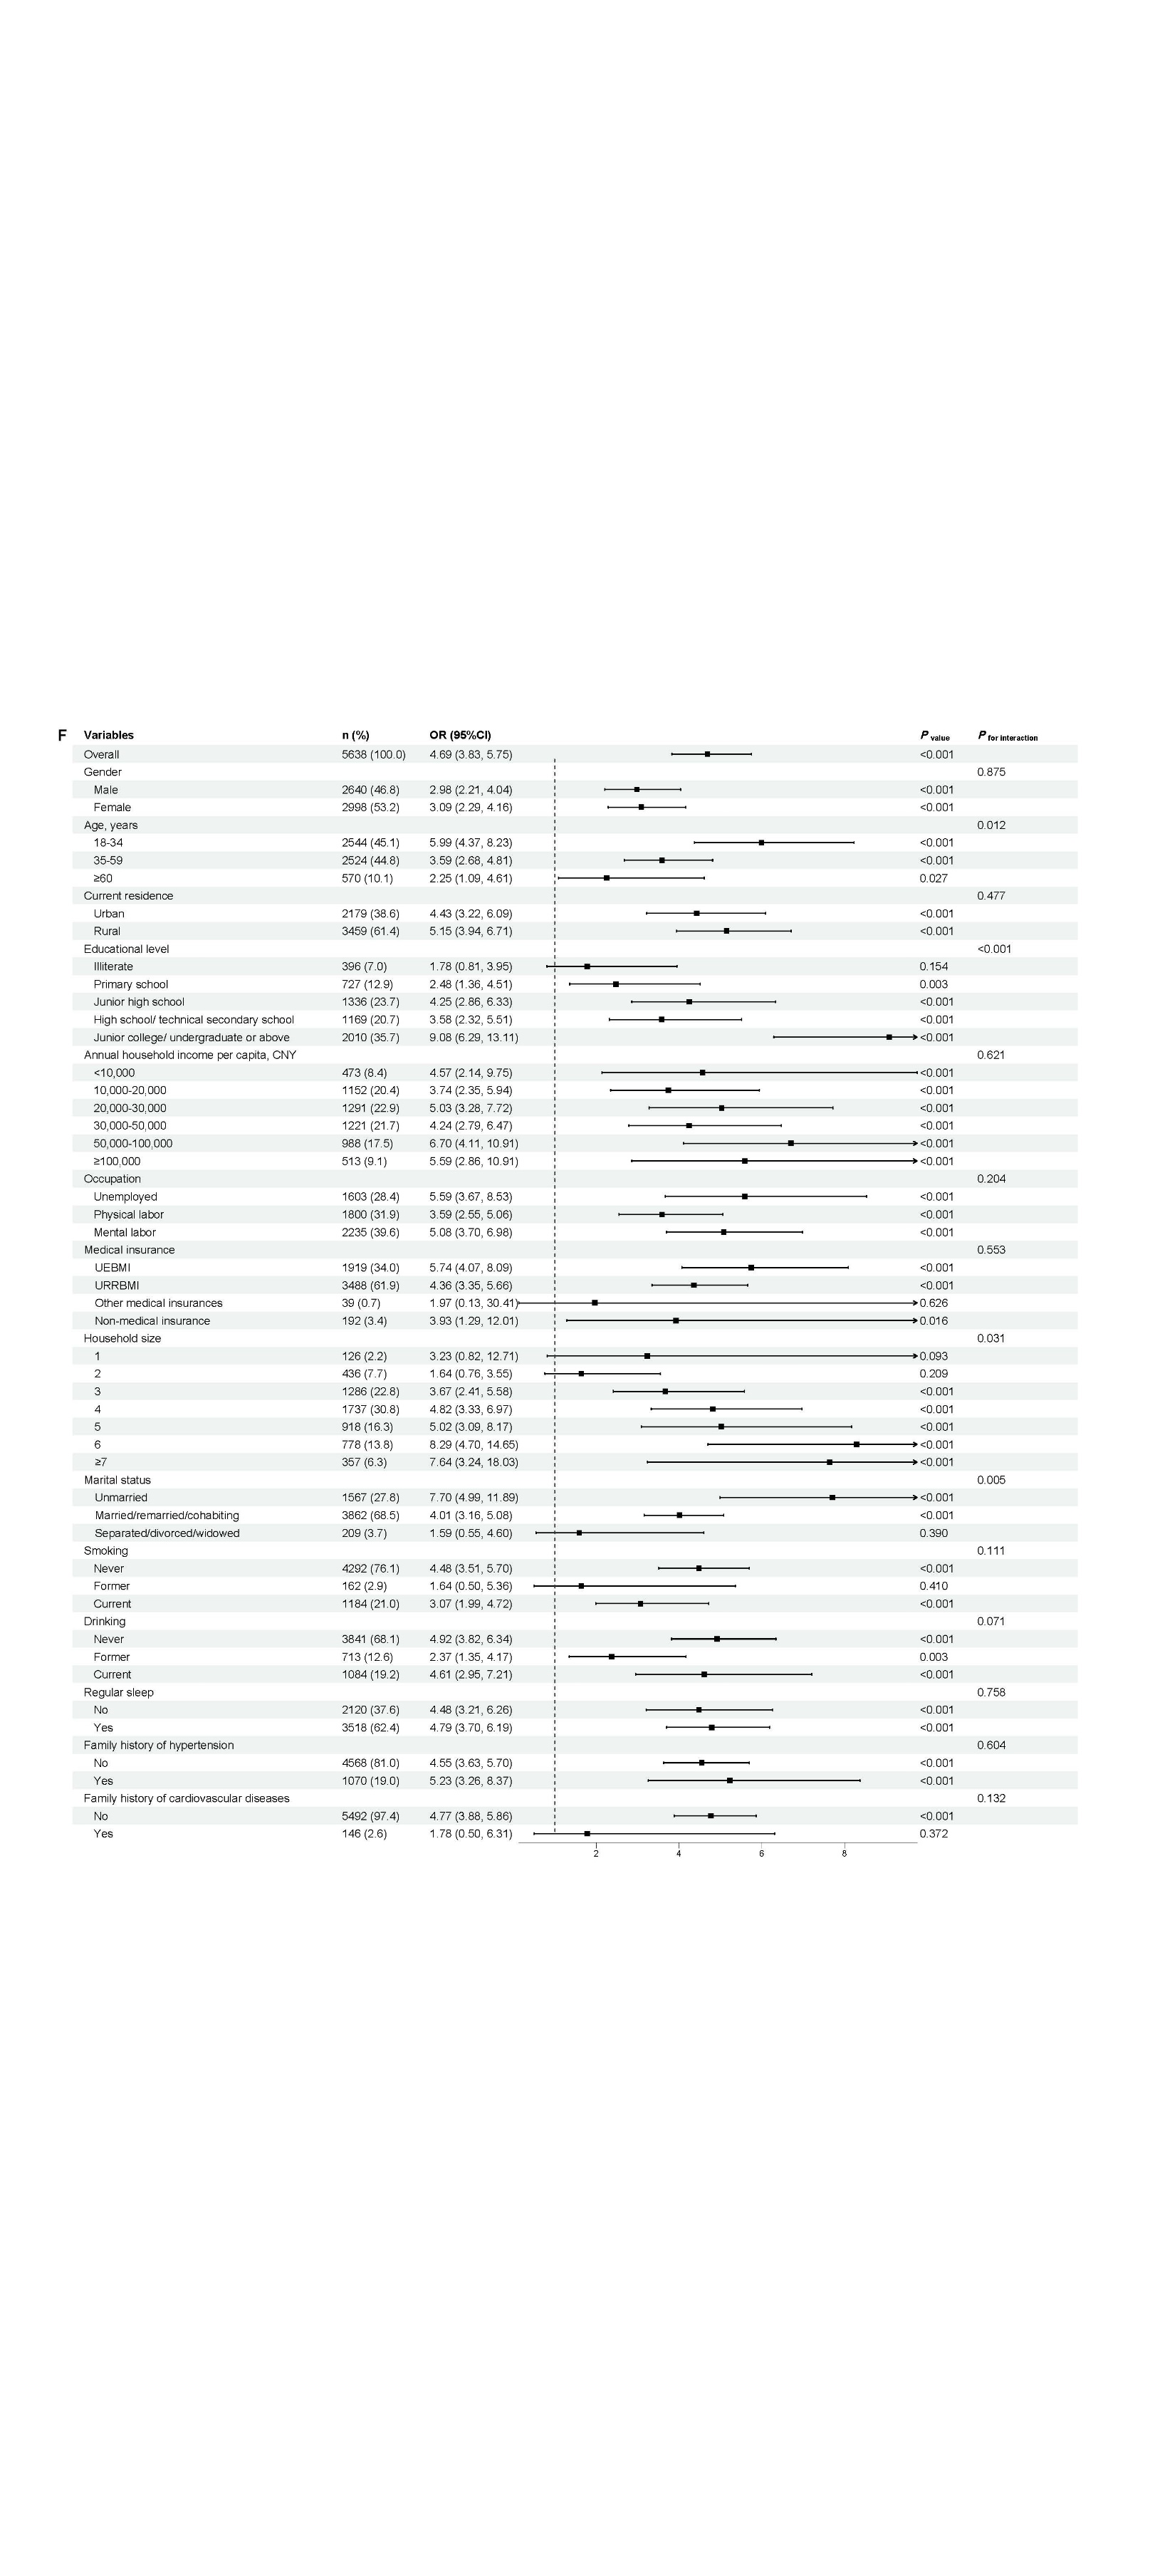


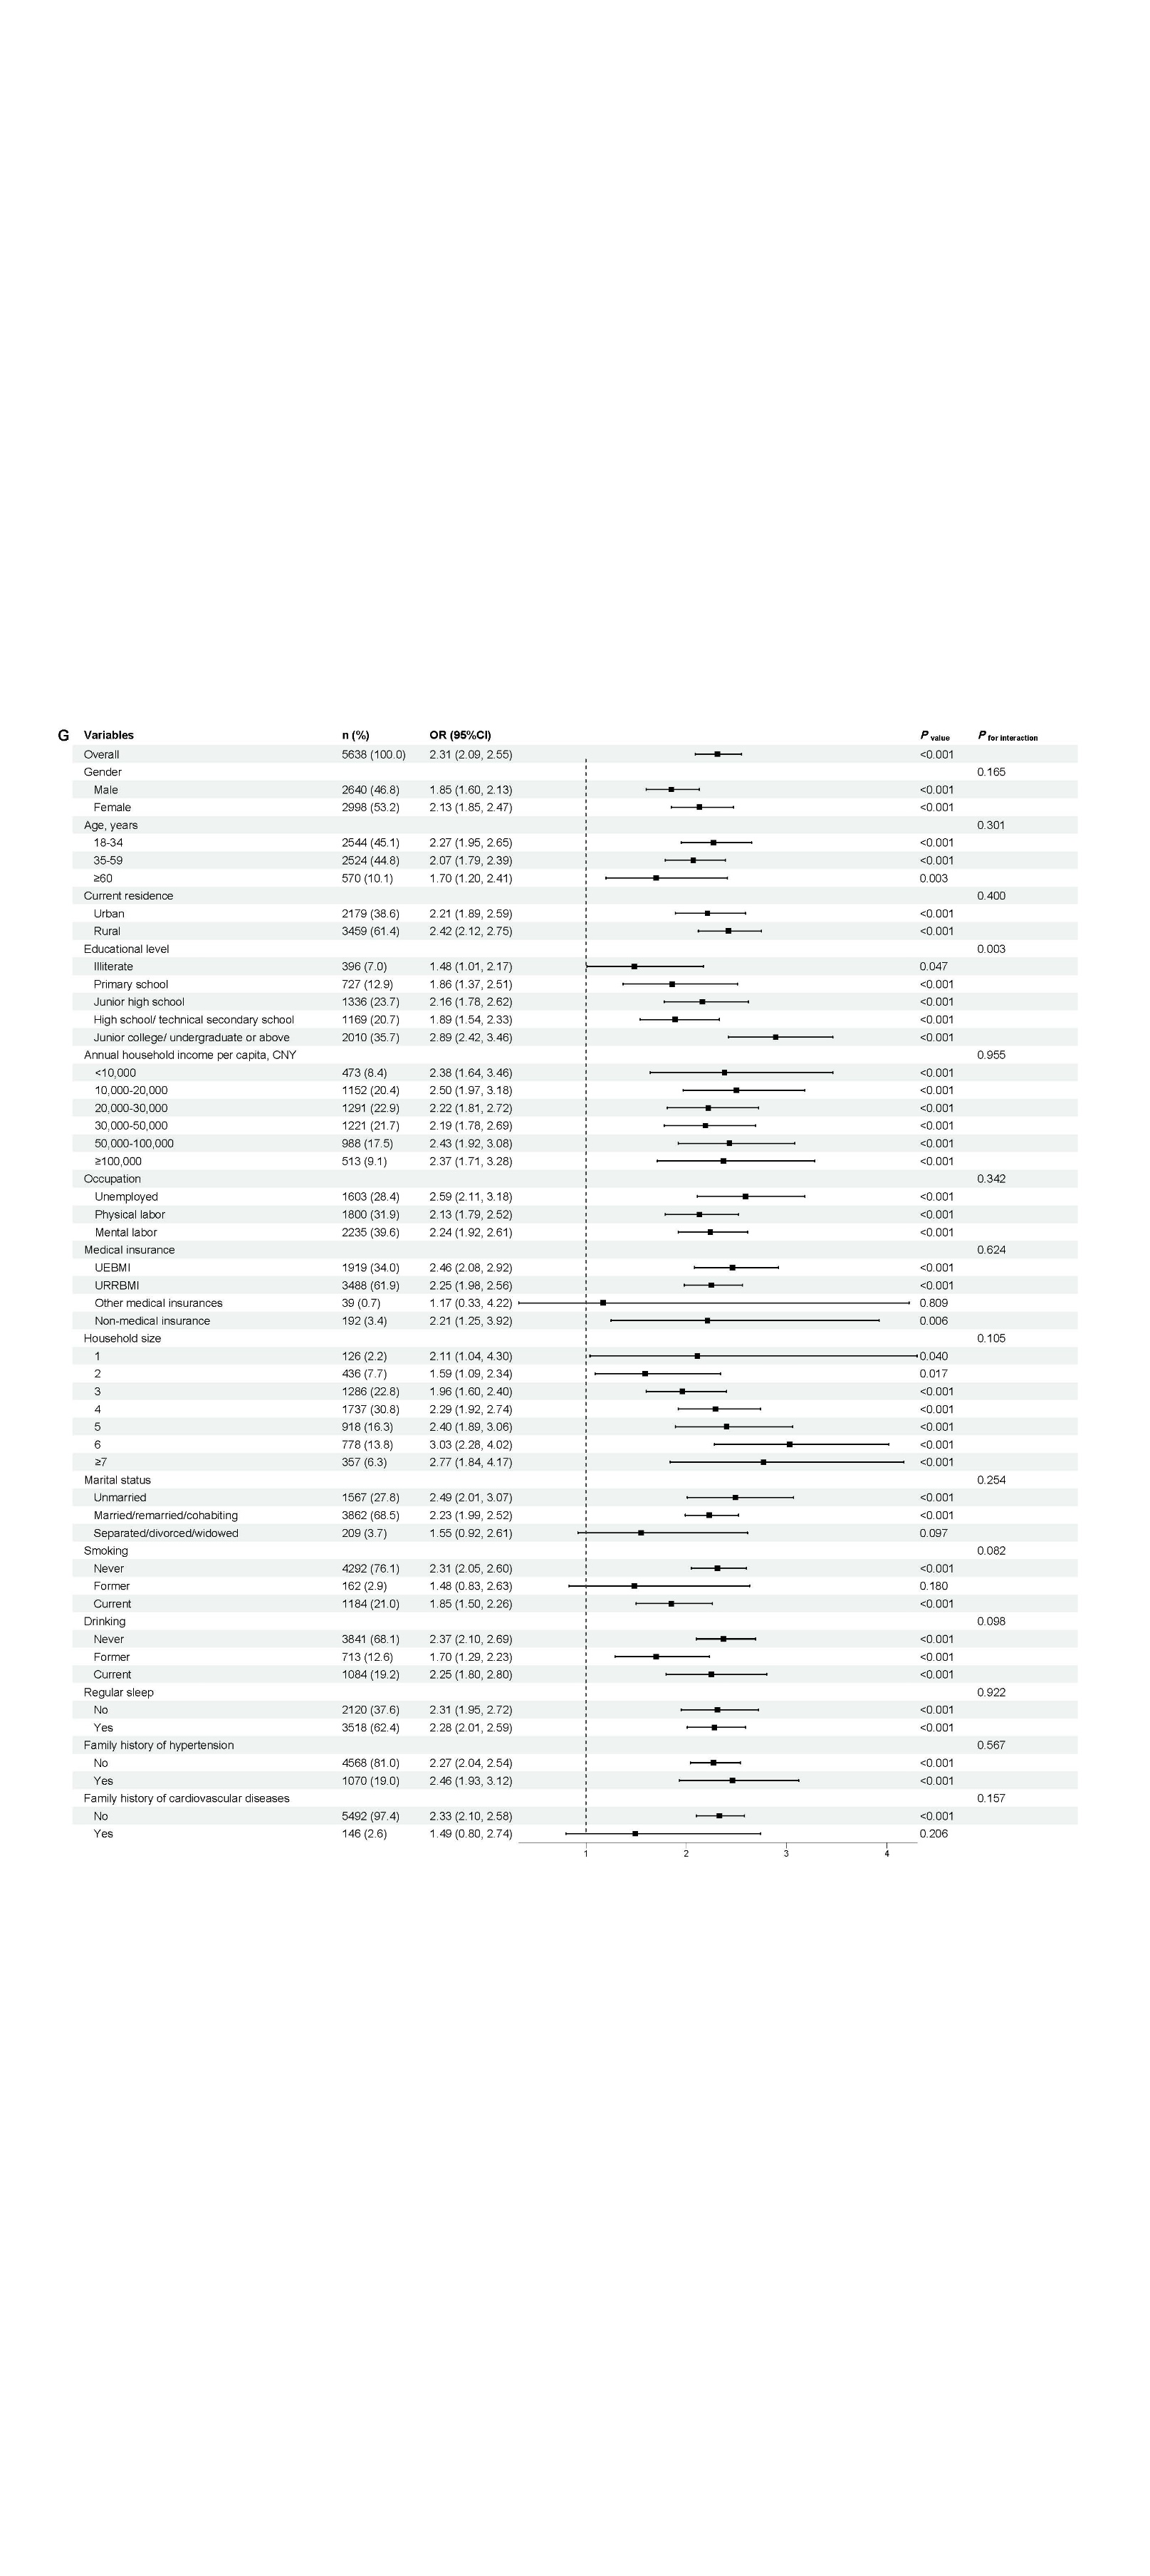


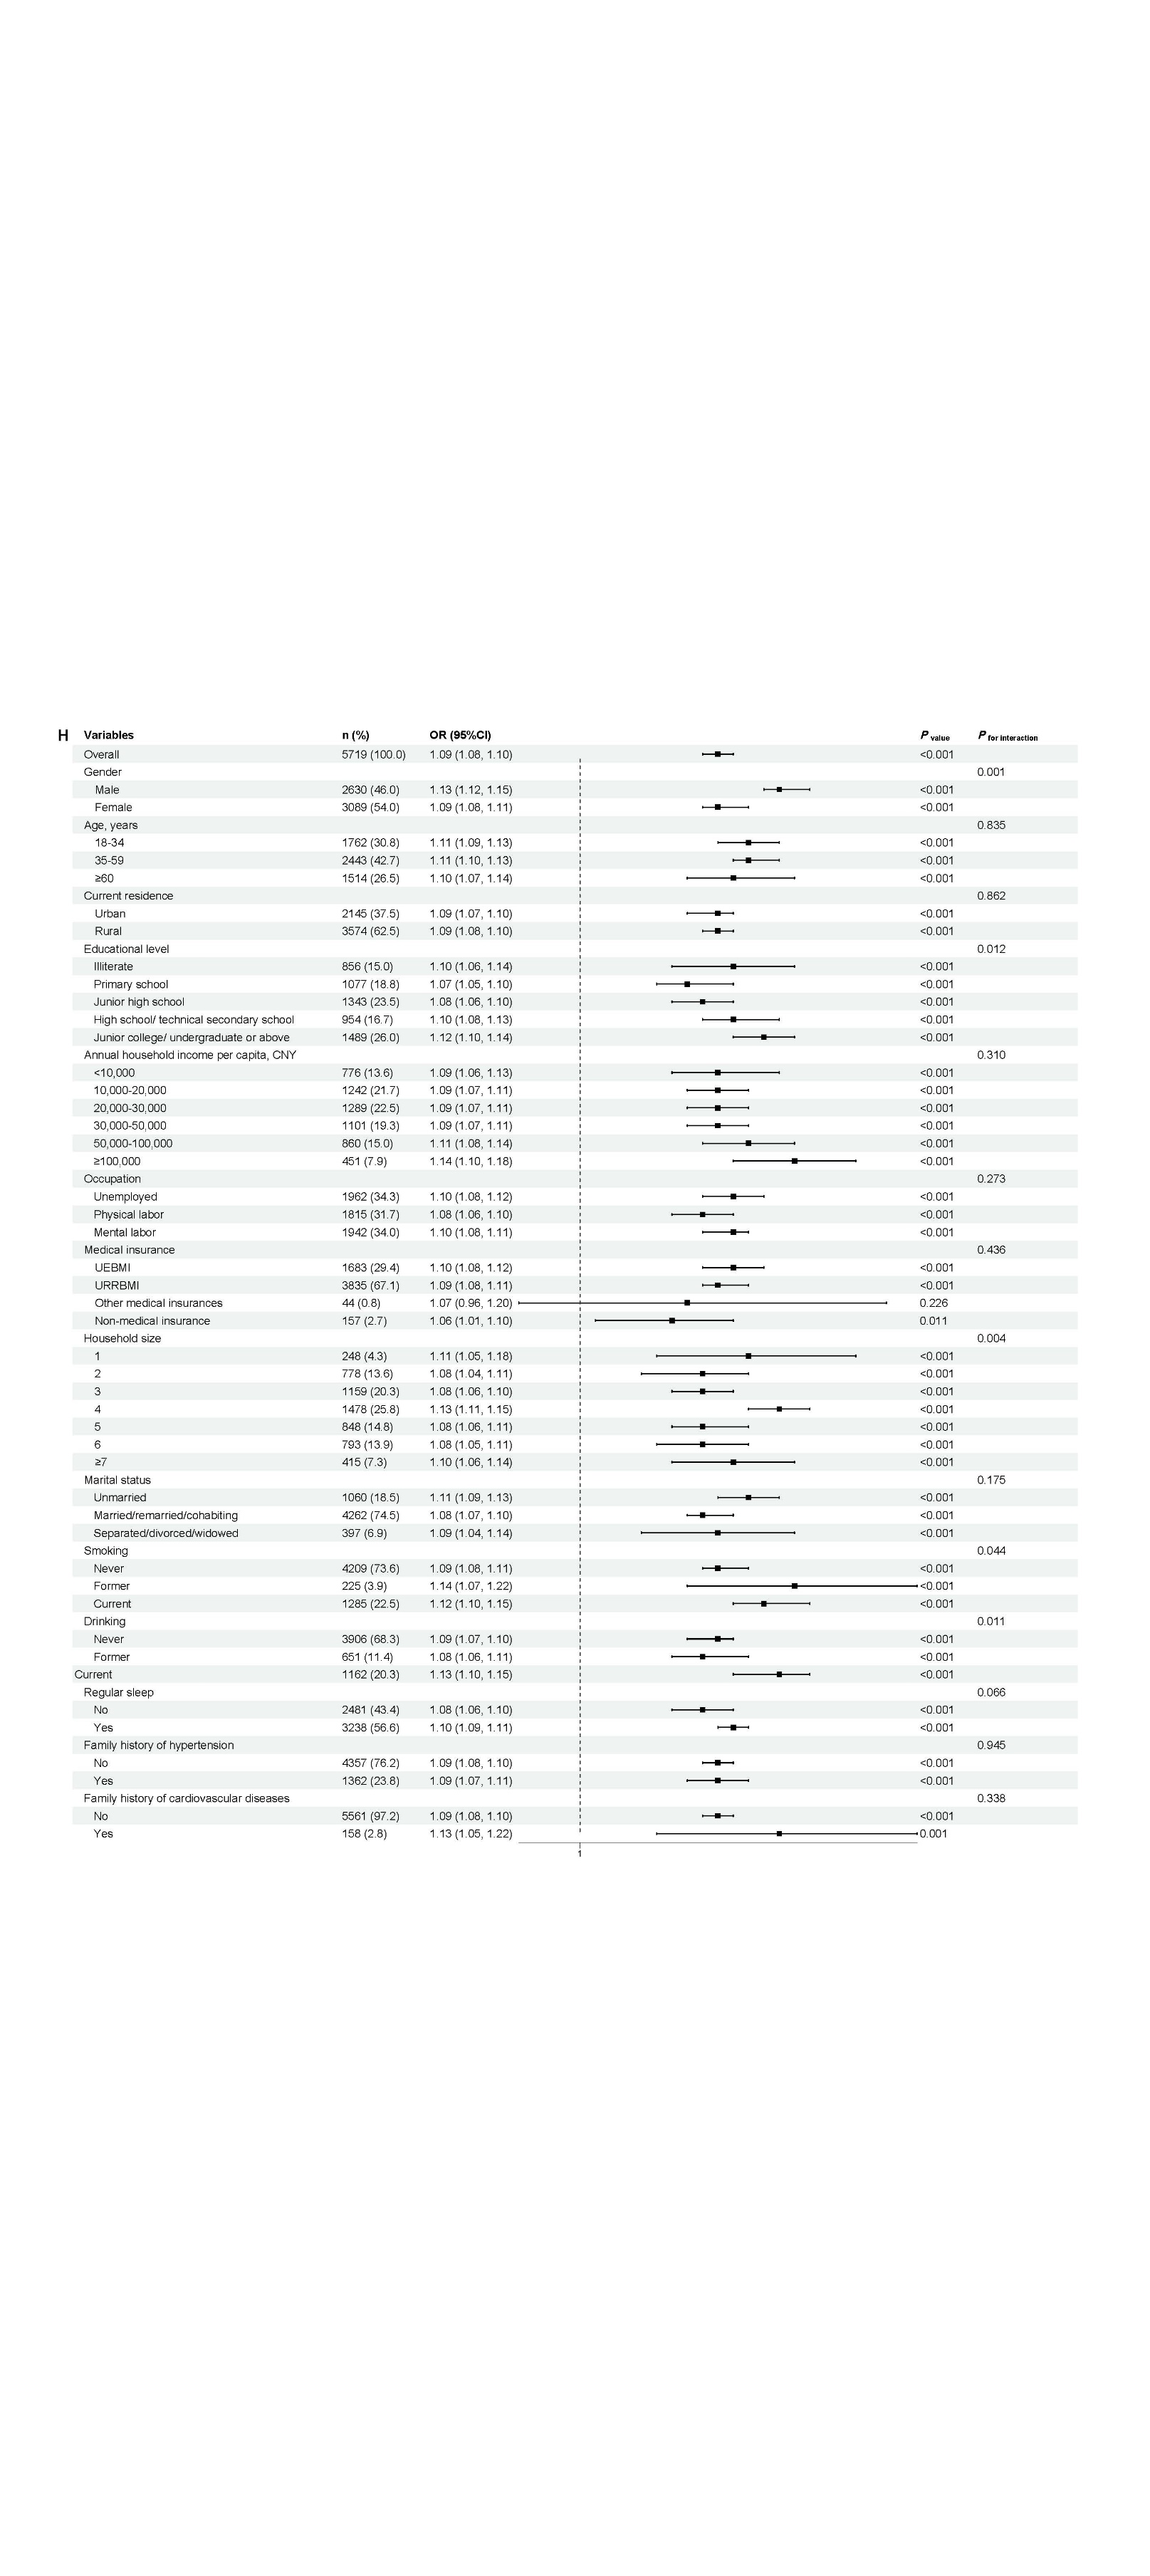


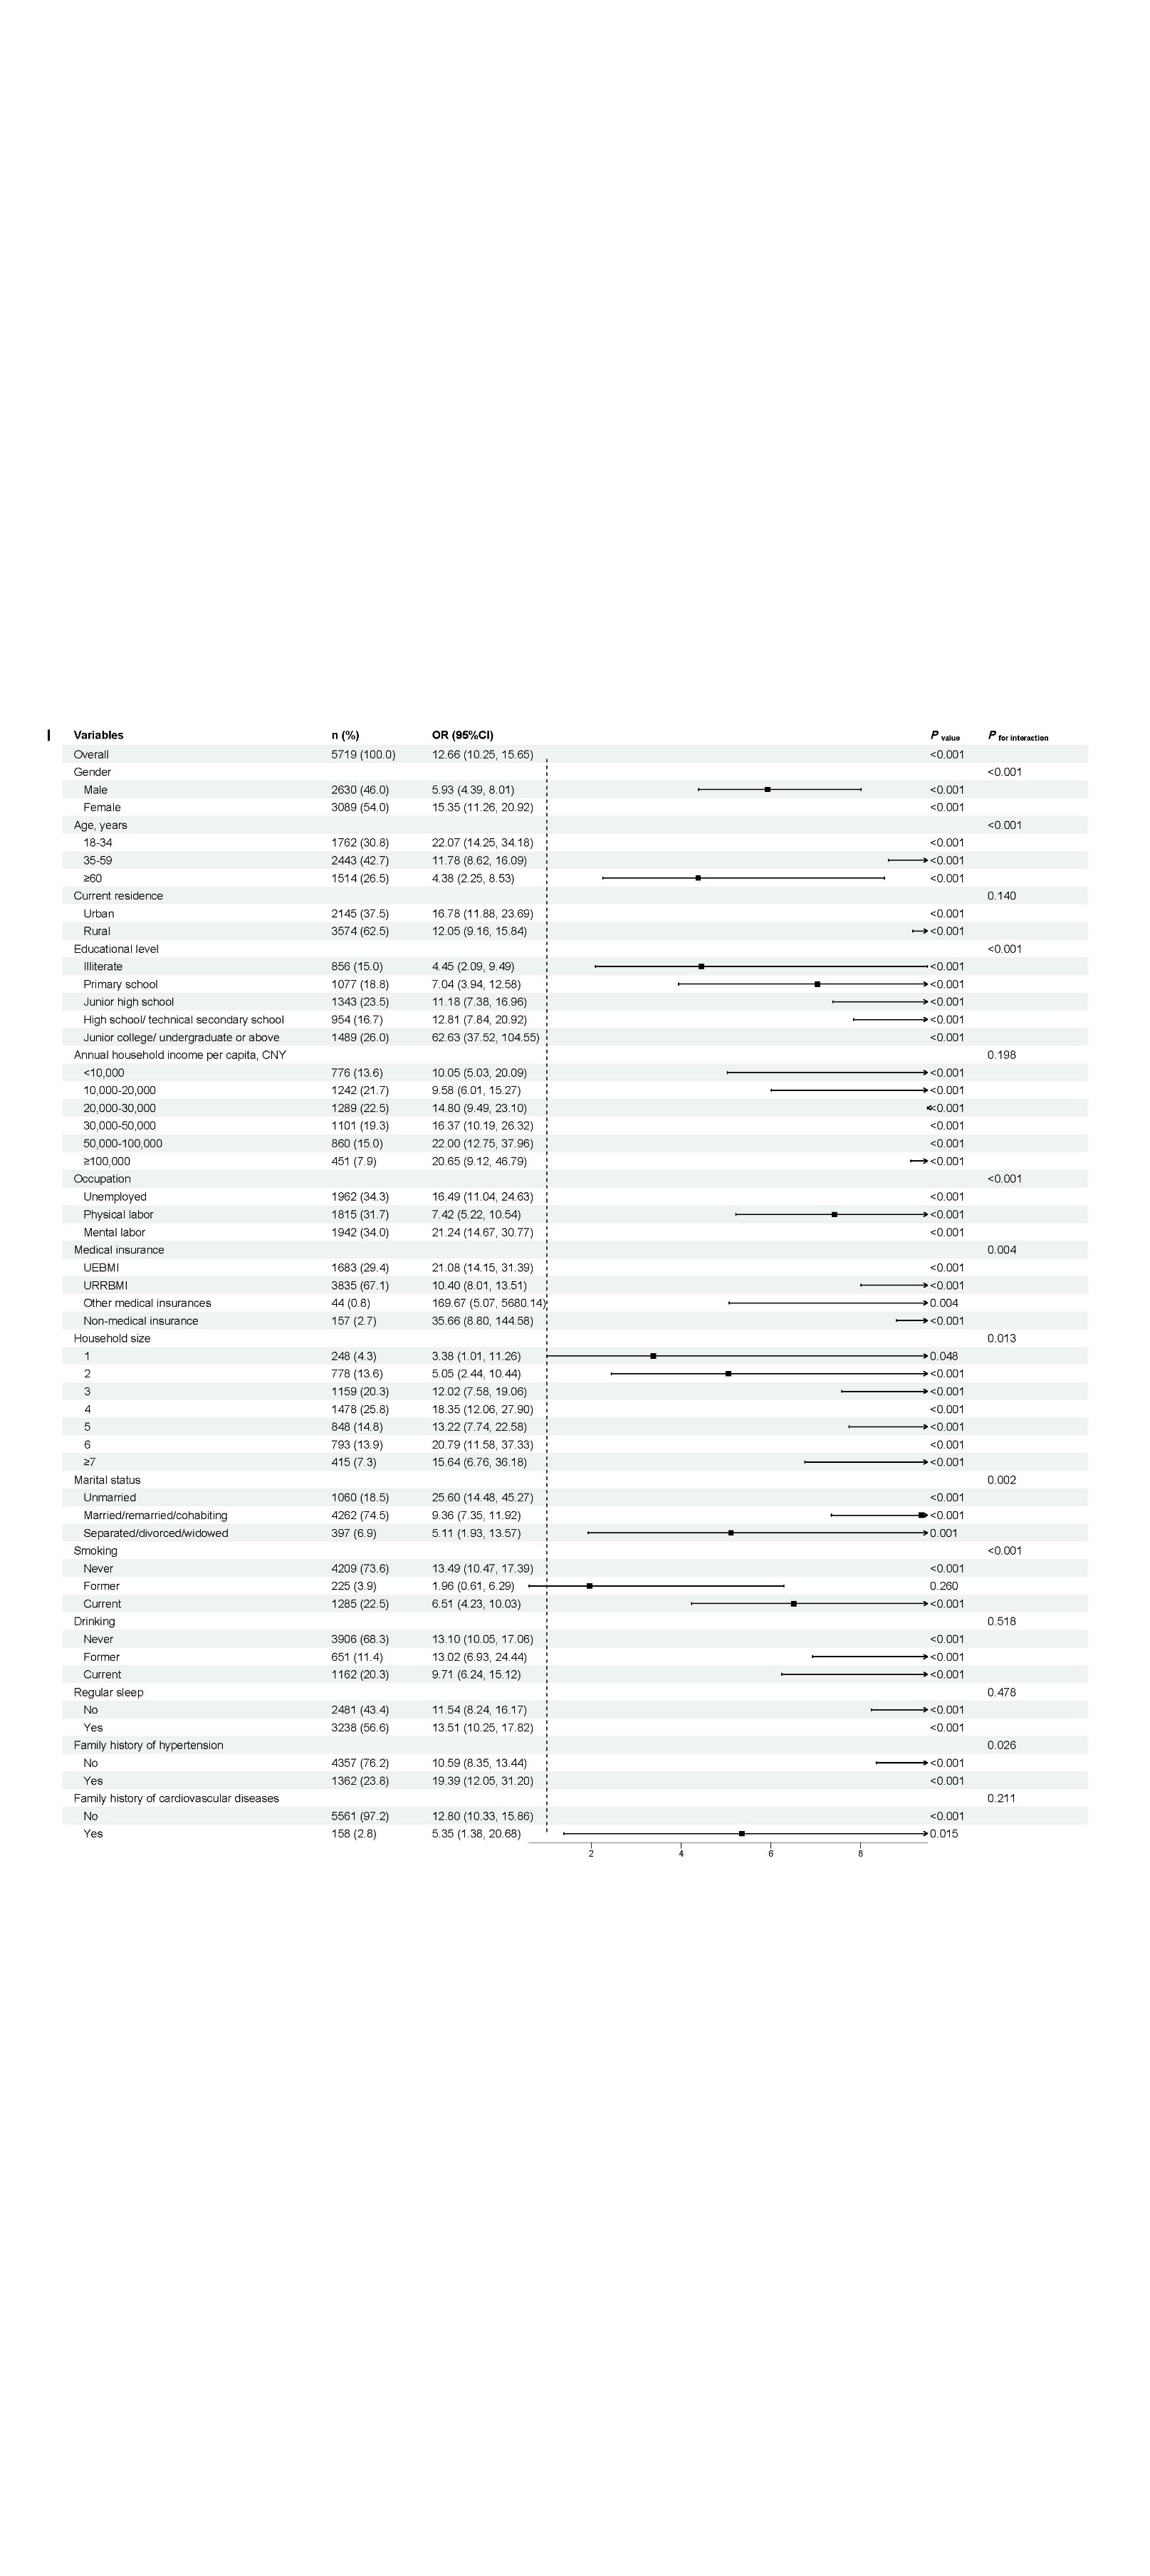


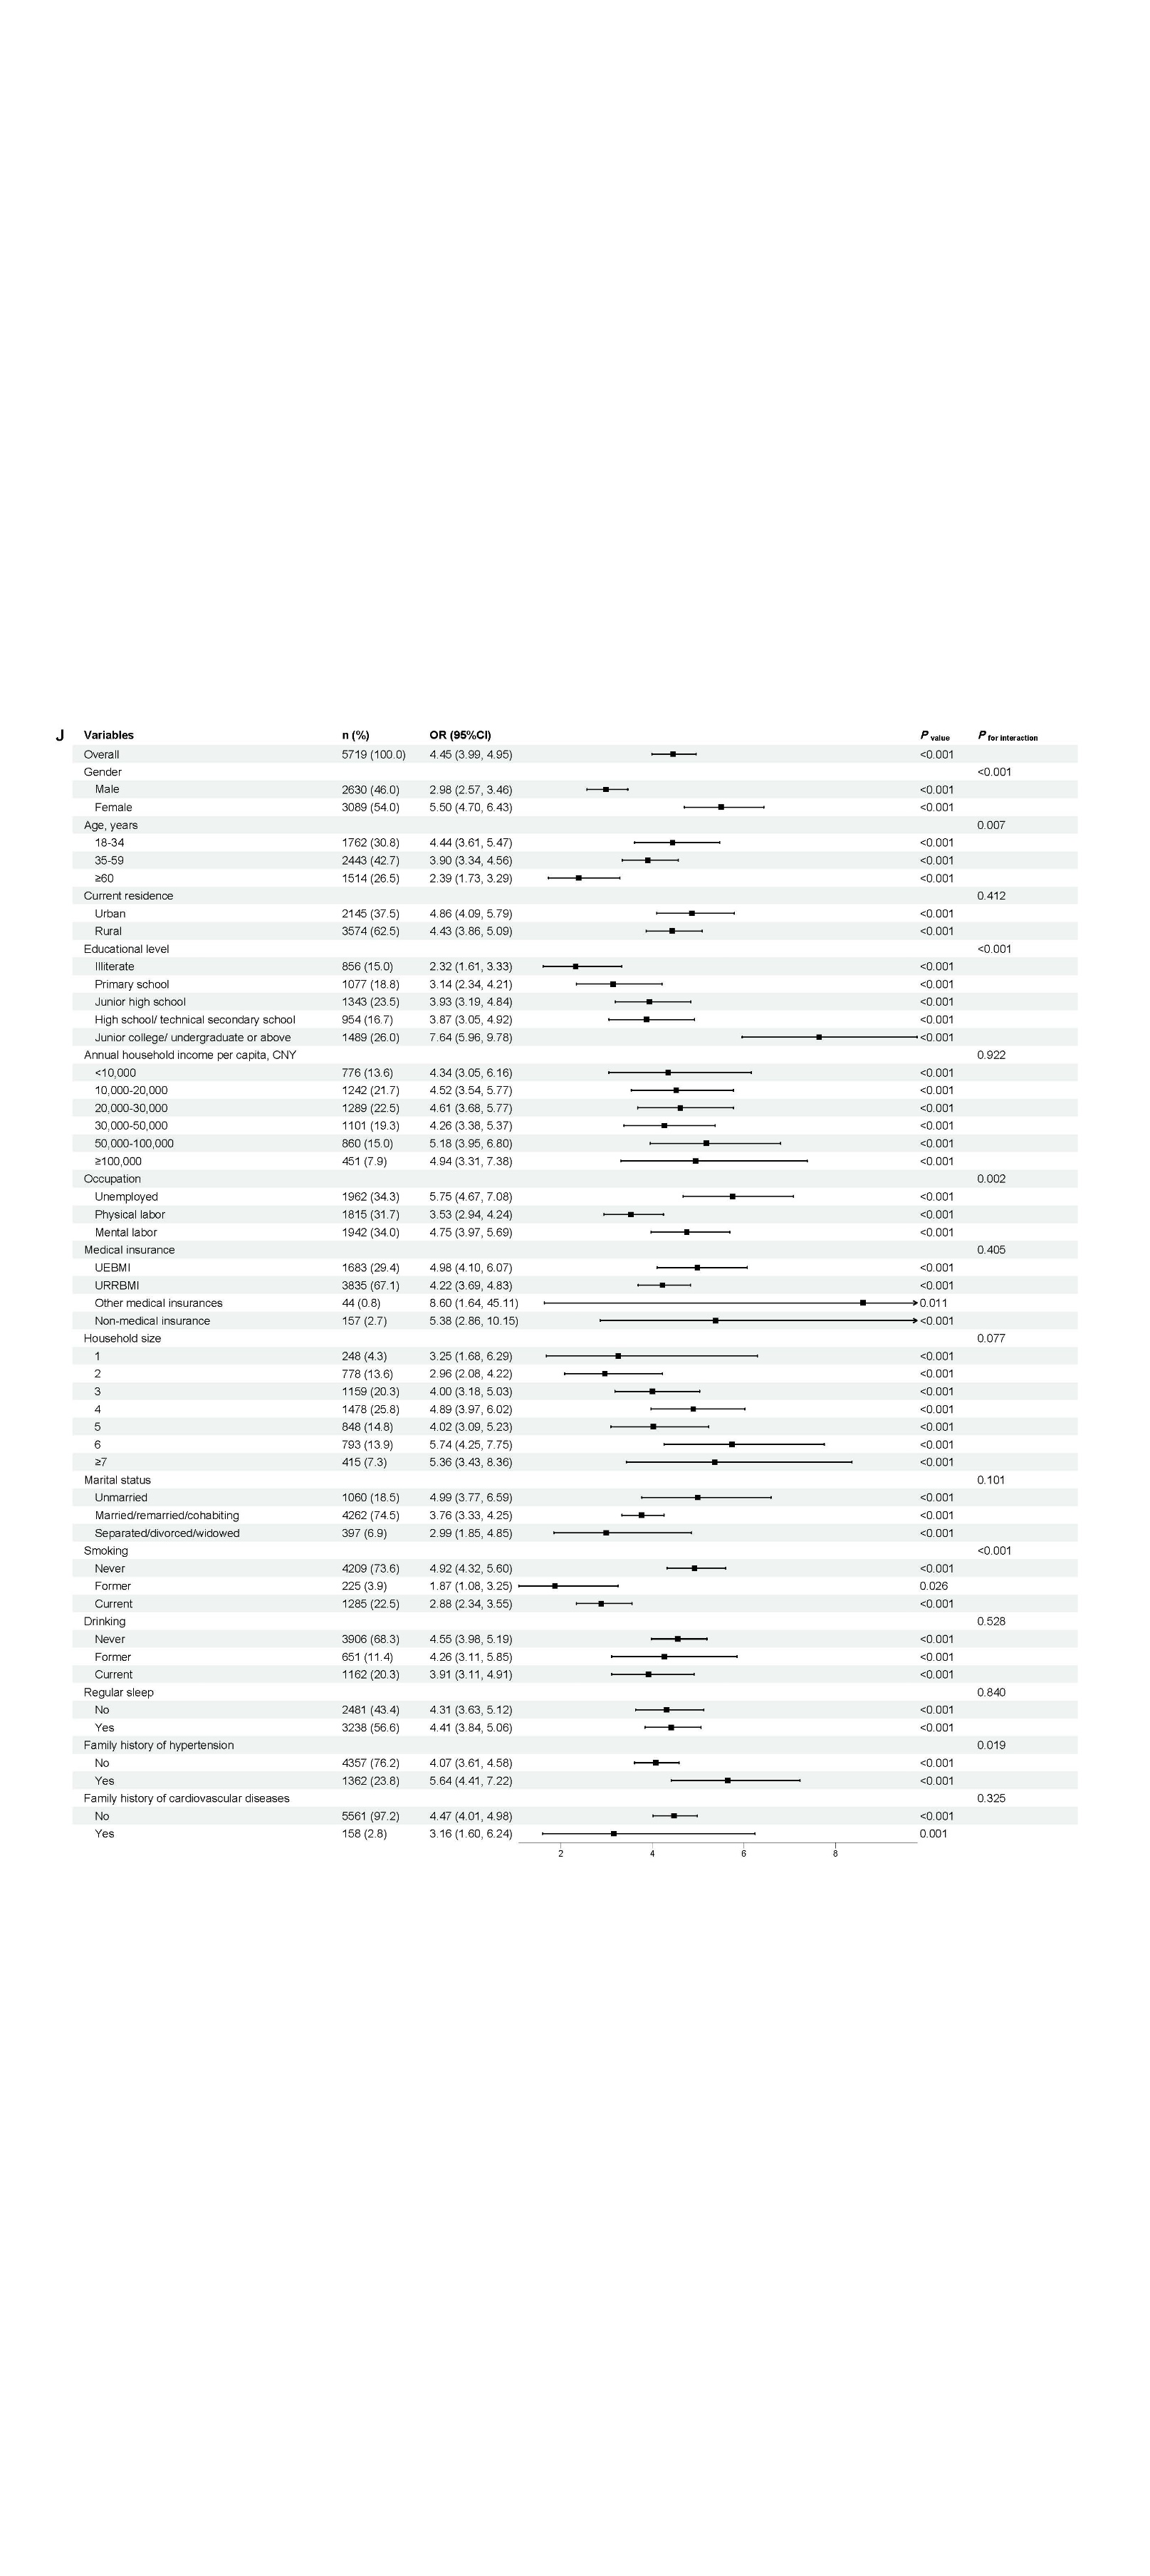


**Supplementary Figure 2** Subgroup analyses of the conventional and unconventional anthropometric parameters with prehypertension and hypertension

**Notes:** (A) subgroup analysis of weight and pre-hypertension; (B) subgroup analysis of BMI and pre-hypertension; (C) subgroup analysis of HtaW and pre-hypertension; (D) subgroup analysis of FMI and pre-hypertension; (E) subgroup analysis of FFMI and pre-hypertension; (F) subgroup analysis of AIP and pre-hypertension; (G) subgroup analysis of TyG and pre-hypertension; (H) subgroup analysis of FM and hypertension; (I) subgroup analysis of AIP and hypertension; (J) subgroup analysis of TyG and hypertension.

**Abbreviations:** CNY, Chinese Yuan; UEBMI, Urban Employees Basic Medical Insurance; URRBMI, Urban and Rural Residents Basic Medical Insurance.
